# Supplementary material for: Clinical Efficacy and Safety of Chinese Herbal Medicine in the Treatment of Uremic Pruritus: A Meta-Analysis of Randomized Controlled Trials
Source: MDPI journal article supplement (doi:10.3390/ph15101239), 2022-10-09
Supplement: s1 [file s1]

# Supplementary Materials: Clinical Efficacy and Safety of Chinese herbal medicine in the Treatment of Uremic Pruritus: A Meta-Analysis of Randomized Controlled Trials

Ping-Hsun Lu, Chien-Cheng Lai, I-Hsin Lin, Fu-Ming Tsai and Po-Hsuan Lu

**Figure S1.** Forest plot of serum levels in patients with uremic pruritus treated with Chinese herbal medicine: (a) potassium (K), (b) calcium (Ca), (c) phosphorus (P), (d) parathyroid hormone (PTH), and (e) intact parathyroid hormone (iPTH)

**Figure S2.** Forest plot of indicators of renal function in patients with uremic pruritus treated with Chinese herbal medicine: (a) serum creatinine (SCr), (b) blood urea nitrogen (BUN), (c) estimated glomerular filtration rate (eGFR), and (d) uric acid (UA)

**Figure S3.** Forest plot of the serum level of inflammation biomarkers in patients with uremic pruritus treated with Chinese herbal medicine: (a) C-reactive protein (CRP), (b) tumor necrosis factor- $\alpha$  (TNF- $\alpha$ ), (c)  $\beta$ 2-microglobulin ( $\beta$ 2-MG), and (d) interleukin-6 (IL-6)

**Figure S4.** Forest plot of the serum levels in patients with uremic pruritus treated with Chinese herbal medicine: (a) Albumin, (b) Hemoglobin, (c) Aspartate aminotransferase (AST), and (d) Alanine aminotransferase (ALT)

**Figure S5.** Forest plot of adverse events in patients with uremic pruritus treated with Chinese herbal medicine

**Figure S6.** Funnel plot of overall effectiveness and visual analogue scale (VAS) ratings for patients with uremic pruritus treated with Chinese herbal medicine

**Table S1.** Laboratory data for selected studies

**Table S2.** Components of Chinese herbal medicine in the included studies

**Table S3.** Grade profile summary of 'Chinese Herbal Medicine for uremic pruritus' Quality assessment

**Table S4.** Search Strategy

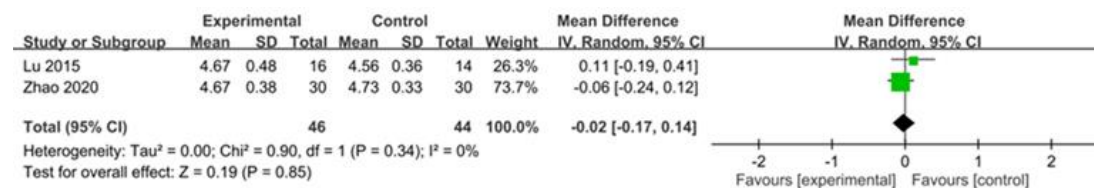

(a) Serum levels of potassium (K) in patients with uremic pruritus treated with Chinese herbal medicine

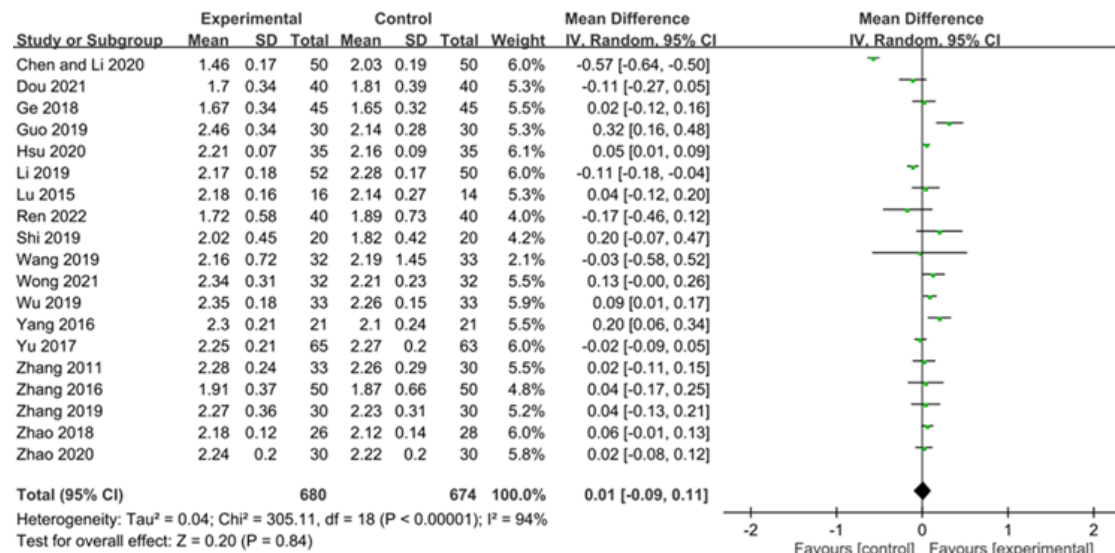

(b) Serum levels of calcium (Ca) in patients with uremic pruritus treated with Chinese herbal medicine

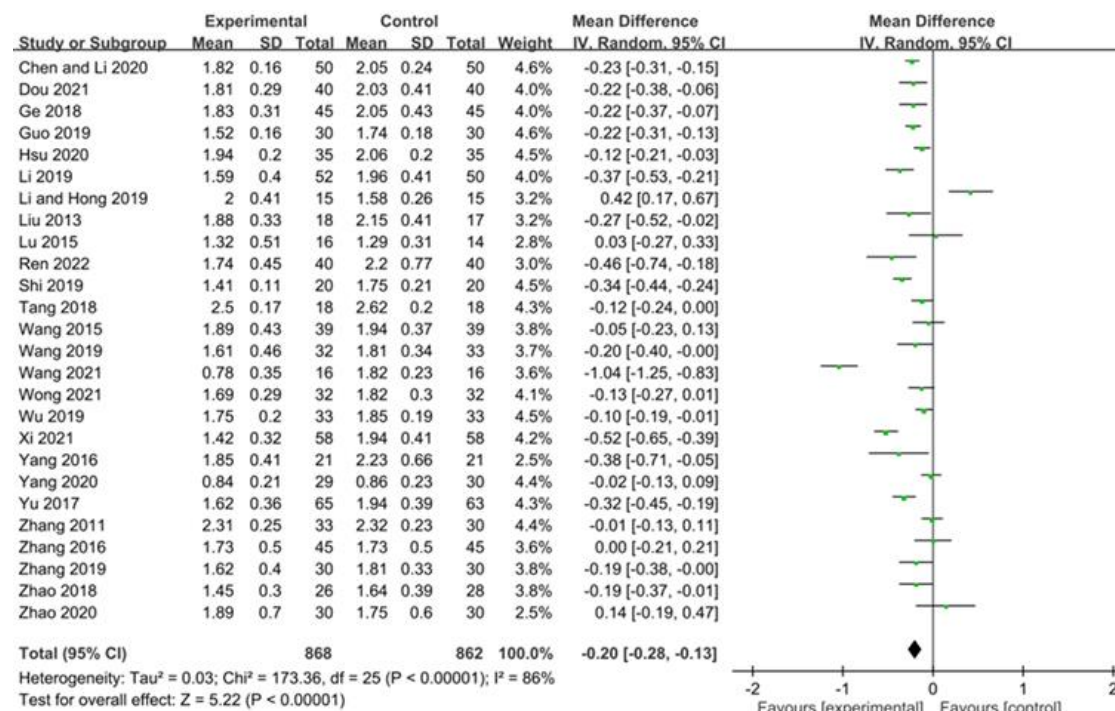

(c) Serum levels of phosphorus (P) in patients with uremic pruritus treated with Chinese herbal medicine

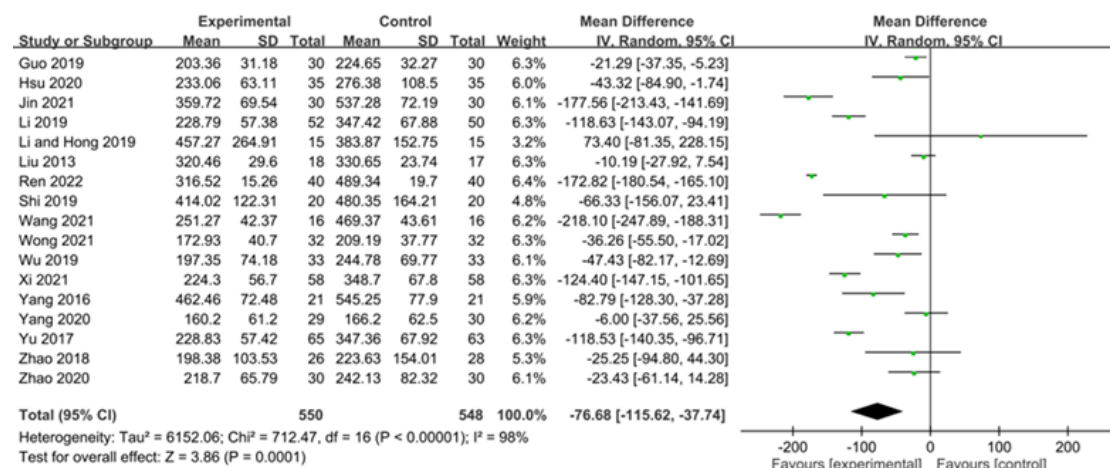

(d) Serum levels of parathyroid hormone (PTH) in patients with uremic pruritus treated with Chinese herbal medicine

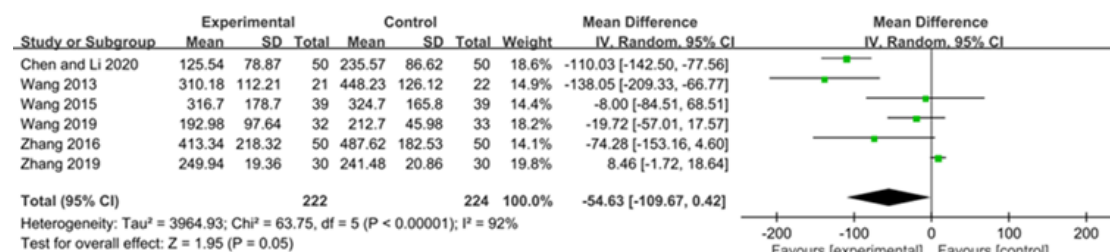

(e) Serum levels of intact parathyroid hormone (iPTH) in patients with uremic pruritus treated with Chinese herbal medicine

**Figure S1.** Forest plot of serum levels in patients with uremic pruritus treated with Chinese herbal medicine: (a) potassium (K), (b) calcium (Ca), (c) phosphorus (P), (d) parathyroid hormone (PTH), and (e) intact parathyroid hormone (iPTH)

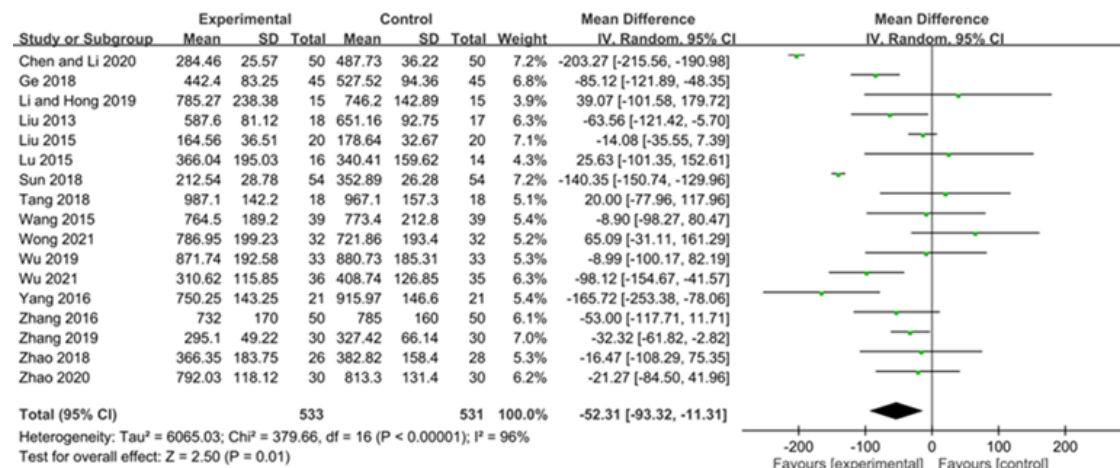

(a) Serum levels of serum creatinine (SCr) in patients with uremic pruritus treated with Chinese herbal medicine

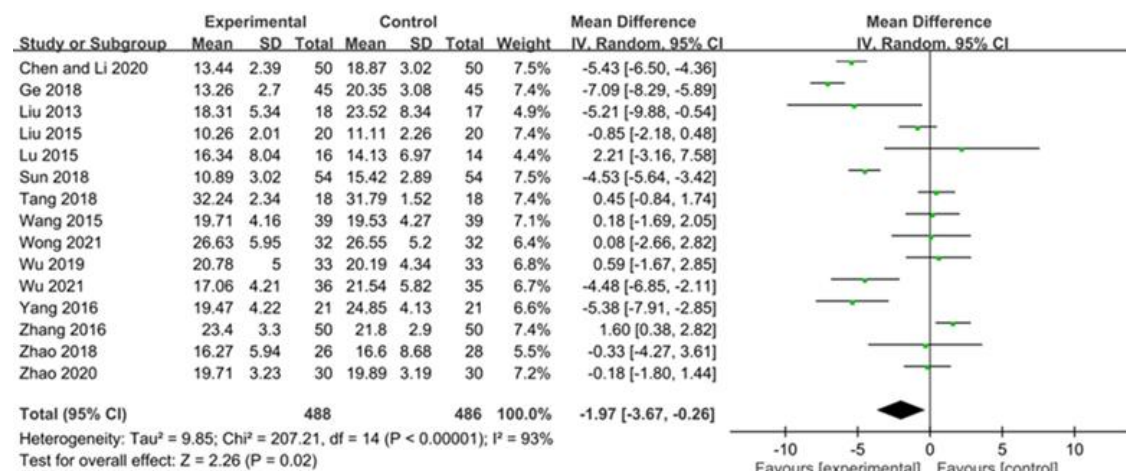

(b) Serum levels of blood urea nitrogen (BUN) in patients with uremic pruritus treated with Chinese herbal medicine

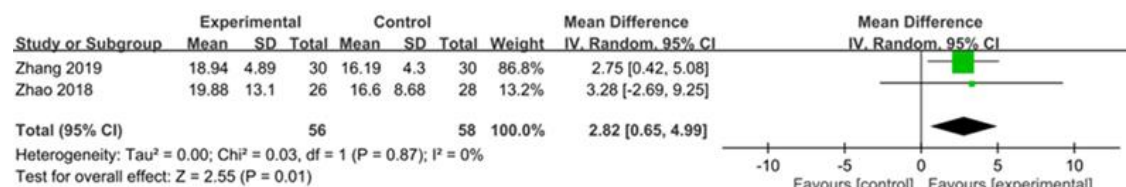

(c) Serum levels of estimated glomerular filtration rate (eGFR) in patients with uremic pruritus treated with Chinese herbal medicine

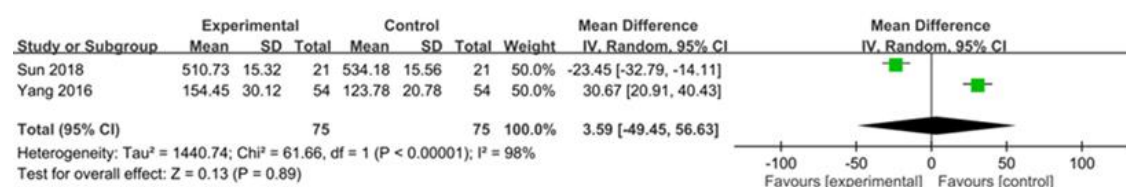

(d) Serum levels of uric acid (UA) in patients with uremic pruritus treated with Chinese herbal medicine

**Figure S2.** Forest plot of indicators of renal function in patients with uremic pruritus treated with Chinese herbal medicine: (a) serum creatinine (SCr), (b) blood urea nitrogen (BUN), (c) estimated glomerular filtration rate (eGFR), and (d) uric acid (UA)

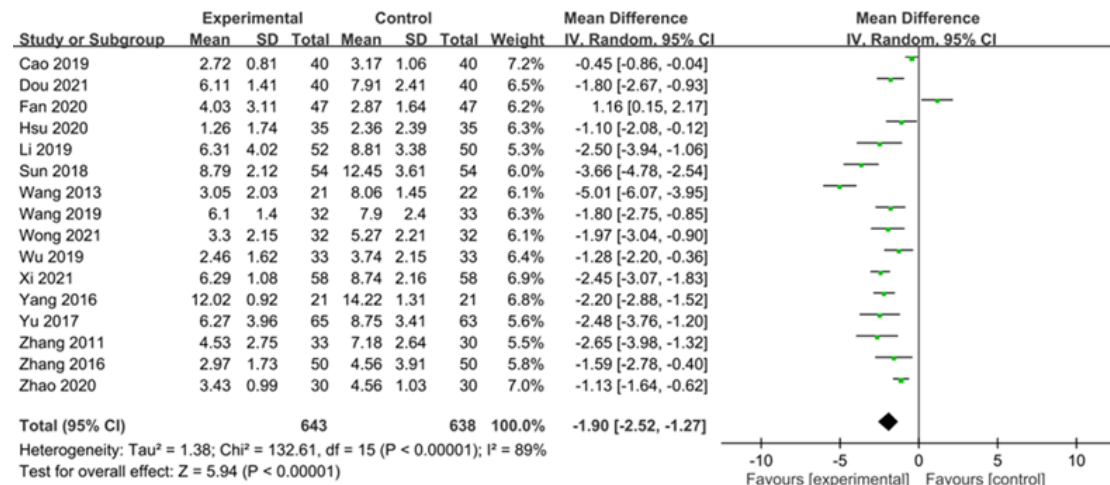

(a) Serum levels of C-reactive protein (CRP) in patients with uremic pruritus treated with Chinese herbal medicine

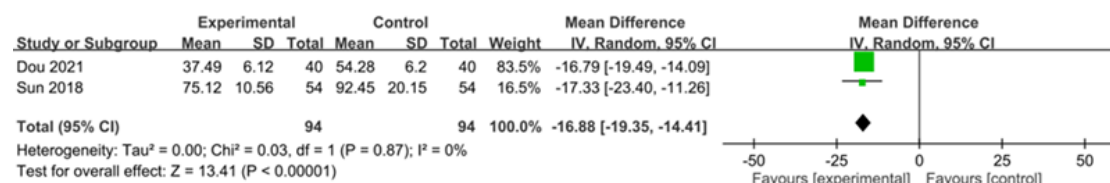

(b) Serum levels of tumor necrosis factor- $\alpha$  (TNF- $\alpha$ ) in patients with uremic pruritus treated with Chinese herbal medicine

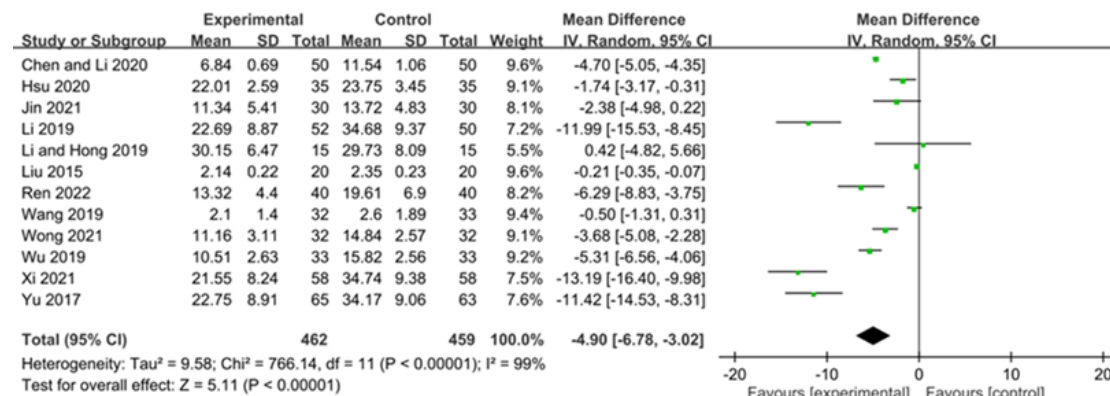

(c) Serum levels of  $\beta 2$ -microglobulin ( $\beta 2$ -MG) in patients with uremic pruritus treated with Chinese herbal medicine

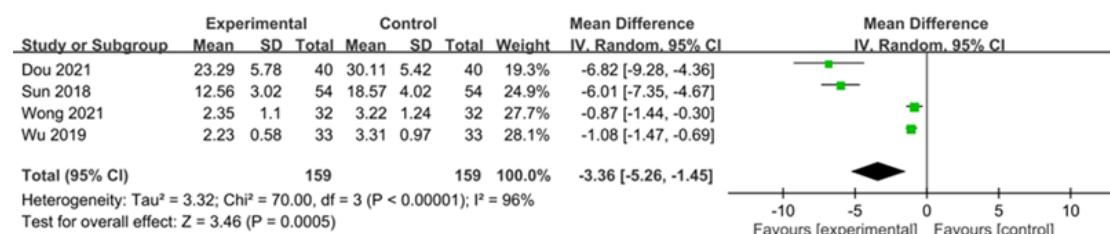

(d) Serum levels of interleukin-6 (IL-6) in patients with uremic pruritus treated with Chinese herbal medicine

**Figure S3.** Forest plot of the serum level of inflammation biomarkers in patients with uremic pruritus treated with Chinese herbal medicine: (a) C-reactive protein (CRP), (b) tumor necrosis factor- $\alpha$  (TNF- $\alpha$ ), (c)  $\beta 2$ -microglobulin ( $\beta 2$ -MG), and (d) interleukin-6 (IL-6)



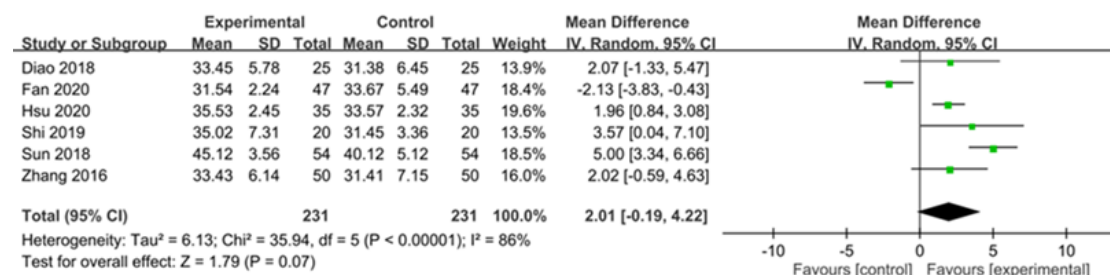

(a) Serum levels of albumin in patients with uremic pruritus treated with Chinese herbal medicine

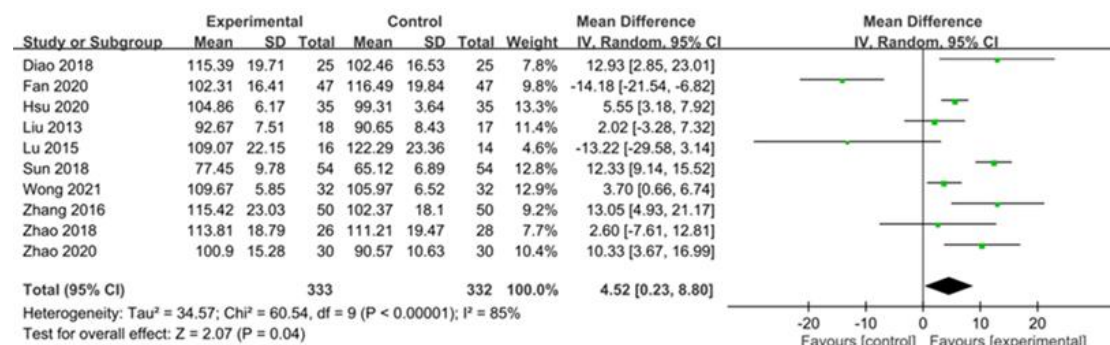

(b) Serum levels of hemoglobin in patients with uremic pruritus treated with Chinese herbal medicine

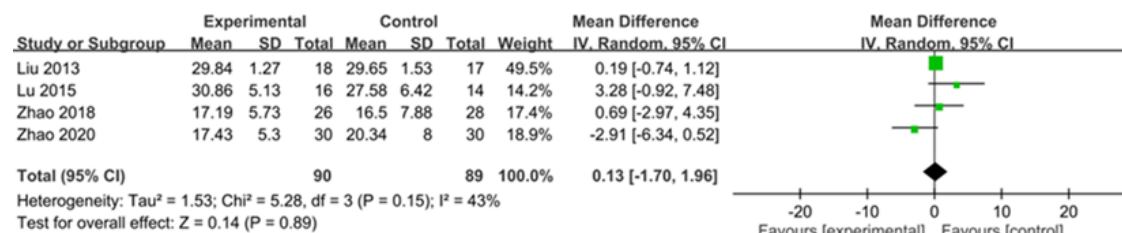

(c) Serum levels of aspartate aminotransferase (AST) in patients with uremic pruritus treated with Chinese herbal medicine

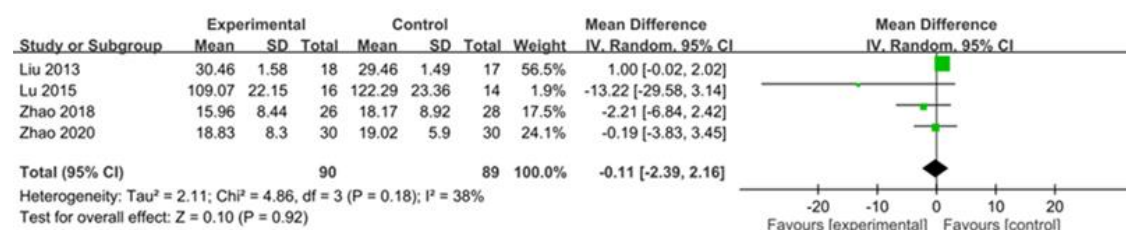

(d) Serum levels of alanine aminotransferase (ALT) in patients with uremic pruritus treated with Chinese herbal medicine

**Figure S4.** Forest plot of the serum levels in patients with uremic pruritus treated with Chinese herbal medicine: (a) Albumin, (b) Hemoglobin, (c) Aspartate aminotransferase (AST), and (d) Alanine aminotransferase (ALT)

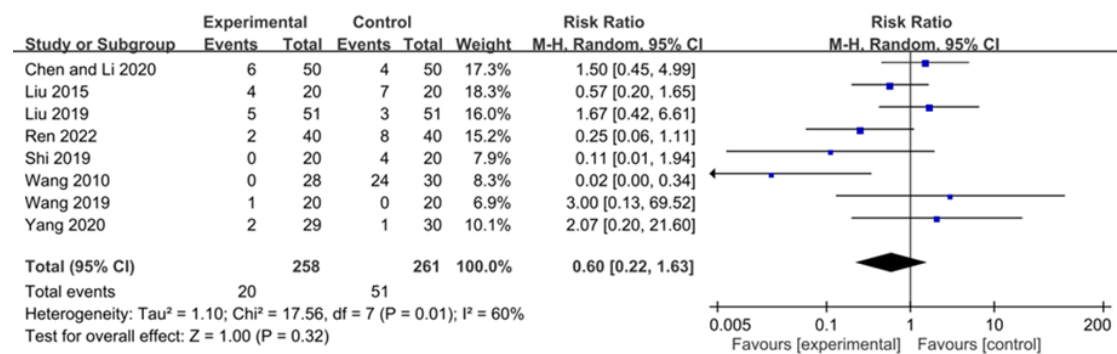

**Figure S5.** Forest plot of adverse events in patients with uremic pruritus treated with Chinese herbal medicine

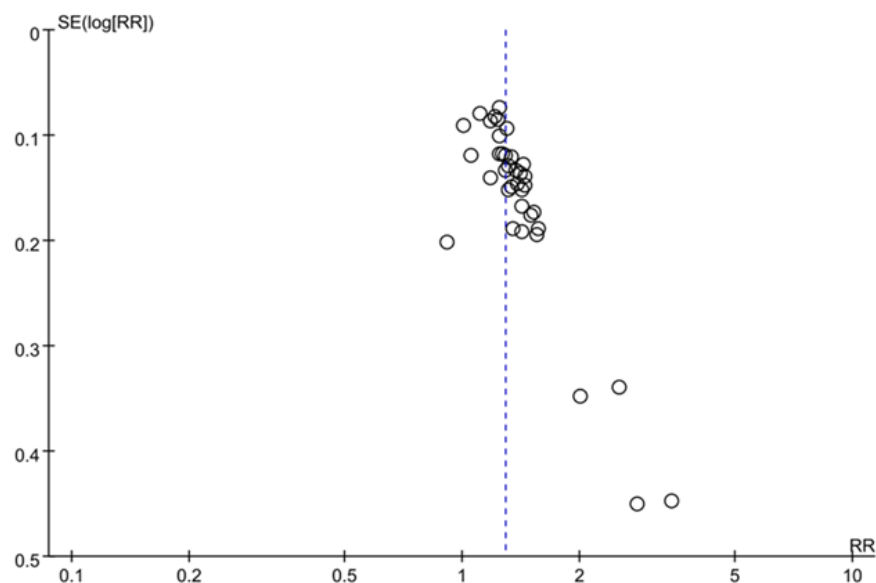

(a) Funnel plot of overall effectiveness for patients with uremic pruritus treated with Chinese herbal medicine

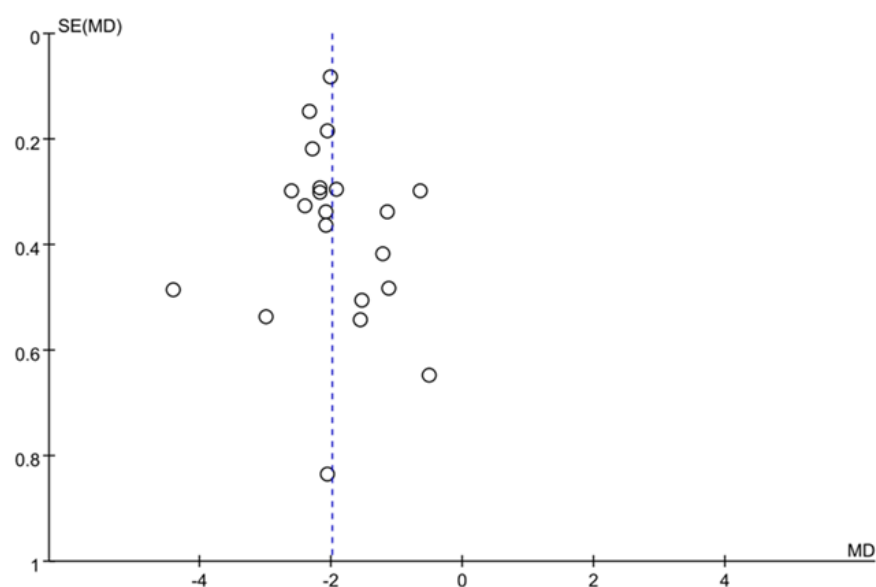

(b) Funnel plot of visual analogue scale (VAS) for patients with uremic pruritus treated with Chinese herbal medicine

**Figure S6.** Funnel plot of overall effectiveness and visual analogue scale (VAS) ratings for patients with uremic pruritus treated with Chinese herbal medicine



**Table S1.** Laboratory data for selected studies

| Study<br>(year)                | Inspecti<br>on data      | Ca (mmol<br>/L) | P (mmol /L)   | PTH (ng /L)      | iPTH (ng /L) | Scr (μmol /L)     | BUN<br>(mmol /L) | UA (μmol /L)       | TNF-α (pg<br>/mL)                             |      |
|--------------------------------|--------------------------|-----------------|---------------|------------------|--------------|-------------------|------------------|--------------------|-----------------------------------------------|------|
| Uremic clearance granule (UCG) |                          |                 |               |                  |              |                   |                  |                    |                                               |      |
| Yang<br>(2016)                 | Ca, P,                   | I:2.09(0.24)    | I:2.31(0.48)  | I:562.11(74.42)  |              | I: 928.25(159.37) | I:26.26(4.47)    | I: 527.01(15.7)    | NA                                            |      |
|                                | PTH,                     | →2.30(0.21)     | →1.85(0.41)   | →462.46(72.48)   |              | →750.25(143.25)   | →19.47(4.22)     | →                  |                                               |      |
|                                | Scr,                     | C:2.09(0.25)    | C:2.17(0.69)  | C:574.22(73.45)  |              | C:930.33(165.26)  | C:26.34(4.67)    | 510.73(15.32)      |                                               |      |
|                                | BUN,                     | →2.10(0.24)     | →2.23(0.66)   | →545.25(77.90)   | NA           | →915.97(146.60)   | →24.85(4.13)     | C:532.23(16.9)     |                                               |      |
|                                | UA,<br>FGF23,<br>CRP     |                 |               |                  |              |                   |                  | →<br>534.18(15.56) |                                               |      |
| Sun et<br>al.<br>(2018)        | Scr,                     |                 |               |                  | NA           |                   |                  |                    | I:<br>115.45(21.4                             |      |
|                                | BUN,                     |                 |               |                  |              |                   |                  |                    | I: 128.45(20.12)                              | 5) → |
|                                | UA, hs-                  |                 |               |                  |              | I:356.12(25.45)   | I: 20.45(3.56)   | →                  | 75.12(10.56                                   |      |
|                                | CRP, IL-                 | NA              | NA            | NA               |              | →212.54(28.78)    | → 10.89(3.02)    | 154.45(30.12)      | )                                             |      |
|                                | 6, TNF-<br>α, Alb,<br>Hb |                 |               |                  |              | C:352.89(26.58)   | C: 20.78(3.69)   | C:127.89(23.12)    | C:<br>115.02(22.0<br>2) →<br>92.45(20.15<br>) |      |
| Guo et<br>al.<br>(2019)        |                          | I:1.75(0.26)    | I:1.92(0.27)  | I:241.16(34.48)  |              |                   |                  |                    |                                               |      |
|                                | Ca, P,                   | →2.46(0.34)     | →1.52(0.16)   | →203.36(31.18)   |              | NA                | NA               | NA                 | NA                                            |      |
|                                | PTH, ER                  | C:1.72(0.25)    | C:1.91(0.24)  | C:240.18(34.22)  |              |                   |                  |                    |                                               |      |
| Yu et<br>al.<br>(2017)         |                          | →2.14(0.28)     | →1.74(0.18)   | →224.65(32.27)   |              |                   |                  |                    |                                               |      |
|                                | Ca, P,                   | I: 2.29(0.18)   | I: 2.34(0.52) | I: 432.35(79.16) |              |                   |                  |                    |                                               |      |
|                                | PTH, β2-                 | →2.25(0.21)     | →1.62(0.36)   | →228.83(57.42)   |              | NA                | NA               | NA                 | NA                                            |      |
|                                | MG, hs-                  | C: 2.32(0.17)   | C: 2.28(0.45) | C: 428.39(74.7)  |              |                   |                  |                    |                                               |      |
| Cao<br>(2019)                  | CRP, ER                  | →2.27(0.20)     | → 1.94(0.39)  | →347.36(67.92)   |              |                   |                  |                    |                                               |      |
|                                | hs-CRP,<br>ER            | NA              | NA            | NA               | NA           | NA                | NA               | NA                 | NA                                            |      |
| Kun et<br>al.<br>(2019)        | ER                       | NA              | NA            | NA               | NA           | NA                | NA               | NA                 | NA                                            |      |

|                                |          |               |               |                   |                |               |    |    |    |                  |               |
|--------------------------------|----------|---------------|---------------|-------------------|----------------|---------------|----|----|----|------------------|---------------|
| Li et al.<br>(2019)            | Ca, P,   | I: 2.32(0.20) | U: 2.41(0.49) | U: 432.41(79.20)  | NA             | NA            | NA | NA | NA |                  |               |
|                                | PTH, β2- | →2.17(0.18)   | →1.59(0.40)   | →228.79(57.38)    |                |               |    |    |    |                  |               |
|                                | MG, hs-  | C: 2.30(0.43) | C: 2.37(0.43) | C: 428.42(74.66)  |                |               |    |    |    |                  |               |
|                                | CRP, ER  | →2.28(0.17)   | → 1.96(0.41)  | →347.42(67.88)    |                |               |    |    |    |                  |               |
| Chen and Li et al.<br>(2020)   | Ca, P,   |               |               |                   | NA             |               |    | NA | NA |                  |               |
|                                | iPTH,    | I: 2.89(0.45) | I: 2.35(0.34) | I: 425.54(105.33) |                |               |    |    |    | I: 753.58(40.74) | I:28.41(4.33) |
|                                | SCr,     | →1.46(0.17)   | →1.82(0.16)   | →125.54(78.84)    |                |               |    |    |    | →284.46(25.57)   | →13.44(2.39)  |
|                                | BUN,     | C: 2.76(0.52) | C: 2.29(0.30) | C: 418.87(102.26) |                |               |    |    |    | C:750.62(42.21)  | C:27.96(4.82) |
|                                | β2-MG,   | →2.03(0.19)   | →2.05(0.24)   | →235.57(86.62)    |                |               |    |    |    | →487.73(36.22)   | →18.87(3.02)  |
| ER,                            |          |               |               |                   |                |               |    |    |    |                  |               |
| ADR                            |          |               |               |                   |                |               |    |    |    |                  |               |
| Xi<br>(2021)                   | P, PTH,  |               | I:2.38(0.41)  | I:430.8(79.3)     | NA             | NA            | NA | NA | NA |                  |               |
|                                | β2-MG,   | NA            | →1.42(0.32)   | →224.3(56.7)      |                |               |    |    |    |                  |               |
|                                | CRP, ER  |               | C:2.37(0.42)  | C:431.1(79.2)     |                |               |    |    |    |                  |               |
|                                |          |               | →1.94(0.41)   | →348.7(67.8)      |                |               |    |    |    |                  |               |
| Li<br>(2021)                   | ER       | NA            | NA            | NA                | NA             | NA            | NA | NA | NA |                  |               |
| Touxie Jiedu Zhiyang Decoction |          |               |               |                   |                |               |    |    |    |                  |               |
| Wang et al.<br>(2015)          | P, iPTH, |               | I:2.43(0.82)  | I:459.4(213.2)    | I:826.3(232.6) | I:22.12(6.67) | NA | NA |    |                  |               |
|                                | SCr,     | NA            | →1.89(0.43)   | →316.7(178.7)     | →764.5(189.2)  | →19.71(4.16)  |    |    |    |                  |               |
|                                | BUN,     |               | C:2.38(0.85)  | C:432.7(251.3)    | C:801.5(270.3) | C:21.86(7.13) |    |    |    |                  |               |
|                                | ER       |               | →1.94(0.37)   | →324.7(165.8)     | →773.4(212.8)  | →19.53(4.27)  |    |    |    |                  |               |
| Zhang et al.<br>(2015)         | NA       | NA            | NA            | NA                | NA             | NA            | NA | NA | NA |                  |               |
| Zhang et al.<br>(2016)         | Ca, P,   |               |               |                   | NA             |               | NA | NA | NA |                  |               |
|                                | iPTH,    |               |               |                   |                |               |    |    |    |                  |               |
|                                | Alb, Hb, | I: 1.76(0.48) | I: 1.82(0.54) | I:450.46(233.36)  |                |               |    |    |    | I:713(180)       | I:21.2(3.8) → |
|                                | CRP,     | →1.91(0.37)   | →1.73(0.50)   | →413.34(218.32)   |                |               |    |    |    | →732(170)        | 23.4(3.3)     |
|                                | HCT,     | C: 1.82(0.54) | C: 1.42(0.41) | C:490.36(187.29)  |                |               |    |    |    | C:778(170)       | C:22.4(2.4) → |
|                                | SCr,     | →1.87(0.66)   | →1.73(0.50)   | →487.62(182.53)   |                |               |    |    |    | →785(160)        | 21.8(2.9)     |
| BUN,                           |          |               |               |                   |                |               |    |    |    |                  |               |
| AL, ALP                        |          |               |               |                   |                |               |    |    |    |                  |               |
| Diao et al.<br>(2018)          | Alb, Hb, | NA            | NA            | NA                | NA             | NA            | NA | NA | NA |                  |               |
| ER, QOL                        |          |               |               |                   |                |               |    |    |    |                  |               |

|                                 |                                                                   |                                                              |                                                              |                                                                            |                                                                        |                                                                         |                                                                   |    |                                                                                |
|---------------------------------|-------------------------------------------------------------------|--------------------------------------------------------------|--------------------------------------------------------------|----------------------------------------------------------------------------|------------------------------------------------------------------------|-------------------------------------------------------------------------|-------------------------------------------------------------------|----|--------------------------------------------------------------------------------|
| Shi<br>(2019)                   | Ca, P,<br>PTH,<br>Alb, Hb,<br>ER,<br>ADR                          | I: 1.80(0.23)<br>→2.02(0.45)<br>C: 1.81(0.23)<br>→1.82(0.42) | I: 1.87(0.21)<br>→1.41(0.11)<br>C: 1.87(0.21)<br>→1.75(0.21) | I:490.12(175.21)<br>→414.02(122.31)<br>C:490.21(175.25)<br>→480.35(164.21) | NA                                                                     | NA                                                                      | NA                                                                | NA | NA                                                                             |
| Chen<br>(2020)                  | NA                                                                | NA                                                           | NA                                                           | NA                                                                         | NA                                                                     | NA                                                                      | NA                                                                | NA | NA                                                                             |
| Yangxue Runfu Yin               |                                                                   |                                                              |                                                              |                                                                            |                                                                        |                                                                         |                                                                   |    |                                                                                |
| Liu<br>(2015)                   | β2-MG,<br>SCr,<br>BUN,<br>ADR                                     | NA                                                           | NA                                                           | NA                                                                         | NA                                                                     | I:224.56(45.35)<br>→164.56(36.51)<br>C:226.18(41.12)<br>→ 178.64(32.67) | I: 16.46(2.31)<br>→ 10.26(2.01)<br>C: 17.11(2.28)<br>→11.11(2.26) | NA | NA                                                                             |
| Hu<br>(2019)                    | NA                                                                | NA                                                           | NA                                                           | NA                                                                         | NA                                                                     | NA                                                                      | NA                                                                | NA | NA                                                                             |
| Wang<br>et al.<br>(2019)        | Ca, P,<br>iPTH,<br>β2-MG,<br>CRP, IL-<br>31, QOL,<br>ADR,<br>PSQI | I: 2.15(0.16)<br>→2.16(0.72)<br>C: 2.20(0.72)<br>→2.19(1.45) | I:1.87(0.29)<br>→1.61(0.46)<br>C:1.85(0.37)<br>→1.81(0.34)   | NA                                                                         | I:213.64(89.41)<br>→192.98(97.64)<br>C:214.98(97.64)<br>→212.70(45.98) | NA                                                                      | NA                                                                | NA | NA                                                                             |
| Dou<br>(2021)                   | Ca, P,<br>CRP,<br>TNF-a,<br>IL-6, ER,<br>PSQI                     | I: 1.62(0.28)<br>→1.70(0.34)<br>C: 1.65(0.34)<br>→1.81(0.39) | I:2.41(0.50)<br>→1.81(0.29)<br>C:2.40(0.53)<br>→2.03(0.41)   | NA                                                                         | NA                                                                     | NA                                                                      | NA                                                                | NA | I:<br>63.37(6.19)<br>→<br>37.49(6.12)<br>C:<br>62.75(6.26)<br>→<br>54.28(6.20) |
| Other Chinese herbal decoctions |                                                                   |                                                              |                                                              |                                                                            |                                                                        |                                                                         |                                                                   |    |                                                                                |
| Zhu et<br>al.<br>(2004)         | ER                                                                | NA                                                           | NA                                                           | NA                                                                         | NA                                                                     | NA                                                                      | NA                                                                | NA | NA                                                                             |
| He<br>(2006)                    | ER                                                                | NA                                                           | NA                                                           | NA                                                                         | NA                                                                     | NA                                                                      | NA                                                                | NA | NA                                                                             |
| Wang<br>et al.<br>(2013)        | CRP,<br>iPTH                                                      | NA                                                           | NA                                                           | NA                                                                         | I:430.12(110.16)<br>→310.18(112.21)<br>C:445.12(122.42)                | NA                                                                      | NA                                                                | NA | NA                                                                             |

|                    |                   |               |              |                  |    |                  |               |                     |    |
|--------------------|-------------------|---------------|--------------|------------------|----|------------------|---------------|---------------------|----|
| →448.23(126.12)    |                   |               |              |                  |    |                  |               |                     |    |
| Ge (2018)          | Ca, P,            | I: 1.72(0.36) | I:2.42(0.55) | NA               | NA | I:912.72(160.21) | I:36.25(3.20) | NA                  | NA |
|                    | SCr,              | →1.67(0.34)   | →1.83(0.31)  |                  |    | →442.40(83.25)   | →13.26(2.7)   |                     |    |
|                    | BUN,              | C: 1.83(0.41) | C:2.43(0.52) |                  |    | C:904.23(174.67) | C:35.43(3.16) |                     |    |
|                    | ER                | →1.65(0.32)   | →2.05(0.43)  |                  |    | →527.52(94.36)   | →20.35(3.08)  |                     |    |
| Tang et al. (2018) | P, SCr, BUN       | NA            | I:2.65(0.19) | NA               | NA | I:1001(136.1)    | I:32.42(1.89) | NA                  | NA |
|                    |                   |               | →2.50(0.17)  |                  |    | →987.1(142.2)    | →32.24(2.34)  |                     |    |
|                    |                   |               | C:2.62(0.17) |                  |    | C:967.1(145.7)   | C:32.76(1.62) |                     |    |
|                    |                   |               | →2.62(0.20)  |                  |    | →967.1(157.3)    | →31.79(1.52)  |                     |    |
| Liu et al. (2019)  | QOL, ER, ADR      | NA            | NA           | NA               | NA | NA               | NA            | NA                  | NA |
| Fan (2020)         | Alb, Hb, CRP, QOL | NA            | NA           | NA               | NA | NA               | NA            | NA                  | NA |
| Yang et al. (2020) | P, PTH, ER, ADR   | NA            | I:1.83(0.55) | I:623.8(295.2)   | NA | NA               | NA            | NA                  | NA |
|                    |                   |               | →0.84(0.21)  | →160.2(61.2)     |    |                  |               |                     |    |
|                    |                   |               | C:1.79(0.46) | C:619.3(289.7)   |    |                  |               |                     |    |
|                    |                   |               | →0.86(0.23)  | →166.2(62.5)     |    |                  |               |                     |    |
| Zhao (2020)        | Ca, P,            | NA            | NA           | NA               | NA | NA               | NA            | NA                  | NA |
|                    | PTH,              |               |              |                  |    |                  |               |                     |    |
|                    | SCr,              |               |              |                  |    |                  |               |                     |    |
|                    | BUN,              |               |              |                  |    |                  |               |                     |    |
|                    | CRP,              |               |              |                  |    |                  |               |                     |    |
|                    | Hb, ER,           |               |              |                  |    |                  |               |                     |    |
| Jin et al. (2021)  | PTH, β2-MG, ER    | NA            | NA           | I:837.31(167.36) | NA | NA               | NA            | NA                  | NA |
|                    |                   |               |              | →359.72(69.54)   |    |                  |               |                     |    |
|                    |                   |               |              | C:725.36(187.06) |    |                  |               |                     |    |
|                    |                   |               |              | →537.28(72.19)   |    |                  |               |                     |    |
| Wang et al. (2021) | P, PTH, UA        | NA            | I:2.37(0.38) | I:667.31(62.53)  | NA | NA               | NA            | Wrong unit reported | NA |
|                    |                   |               | →0.78(0.35)  | →251.27(42.37)   |    |                  |               |                     |    |
|                    |                   |               | C:2.32(0.35) | C: 664.48(61.49) |    |                  |               |                     |    |
|                    |                   |               | →1.82(0.23)  | →469.37(43.61)   |    |                  |               |                     |    |

|                                                                         |                                      |                                                              |                                                              |                                                                            |    |                                                                            |                                                                |    |    |
|-------------------------------------------------------------------------|--------------------------------------|--------------------------------------------------------------|--------------------------------------------------------------|----------------------------------------------------------------------------|----|----------------------------------------------------------------------------|----------------------------------------------------------------|----|----|
| Wu et al. (2021)                                                        | SCr, BUN, ER                         | NA                                                           | NA                                                           | NA                                                                         | NA | I:664.83(165.44)<br>→310.62(115.85)<br>C:665.16(164.83)<br>→408.74(126.85) | I:25.83(6.81)<br>→17.06(4.21)<br>C:26.06(6.92)<br>→21.54(5.82) | NA | NA |
| Zhou et al. (2021)                                                      | PSQL, QOL, ER                        | NA                                                           | NA                                                           | NA                                                                         | NA | NA                                                                         | NA                                                             | NA | NA |
| Other Chinese herbal decoctions—Control group with additional treatment |                                      |                                                              |                                                              |                                                                            |    |                                                                            |                                                                |    |    |
| Wang et al. (2010)                                                      | ER, ADR                              | NA                                                           | NA                                                           | NA                                                                         | NA | NA                                                                         | NA                                                             | NA | NA |
| Luo et al. (2010)                                                       | ER                                   | NA                                                           | NA                                                           | NA                                                                         | NA | NA                                                                         | NA                                                             | NA | NA |
| Zhang et al. (2011)                                                     | Ca, P, CRP, ER                       | I: 2.26(0.27)<br>→2.28(0.24)<br>C: 2.30(0.25)<br>→2.26(0.29) | I: 2.33(0.22)<br>→2.31(0.25)<br>C: 2.30(0.26)<br>→2.32(0.23) | NA                                                                         | NA | NA                                                                         | NA                                                             | NA | NA |
| Li (2015)                                                               | ER                                   | NA                                                           | NA                                                           | NA                                                                         | NA | NA                                                                         | NA                                                             | NA | NA |
| Wang et al. (2016)                                                      | ER                                   | NA                                                           | NA                                                           | NA                                                                         | NA | NA                                                                         | NA                                                             | NA | NA |
| Wu (2016)                                                               | ER                                   | NA                                                           | NA                                                           | NA                                                                         | NA | NA                                                                         | NA                                                             | NA | NA |
| Xie et al. (2016)                                                       | ER                                   | NA                                                           | NA                                                           | NA                                                                         | NA | NA                                                                         | NA                                                             | NA | NA |
| Li and Hong et al. (2019)                                               | P, PTH, β2-MG, SCr, ER               | NA                                                           | I: 2.13(0.63)<br>→2.00(0.41)<br>C: 1.89(0.47)<br>→1.58(0.26) | I:552.28(349.46)<br>→457.27(264.91)<br>C:574.32(279.31)<br>→383.87(152.75) | NA | I:835.13(235.93)<br>→785.27(238.38)<br>C:886.93(207.24)<br>→746.2(142.89)  | NA                                                             | NA | NA |
| Wu (2019)                                                               | Ca, P, PTH, β2-MG, SCr, BUN, hs-CRP, | I: 2.13(0.19)<br>→2.35(0.18)<br>C: 2.19(0.18)<br>→2.26(0.15) | I: 2.13(0.22)<br>→1.75(0.20)<br>C: 2.12(0.21)<br>→1.85(0.19) | I:297.47(105.38)<br>→197.35(74.18)<br>C:292.47(103.59)<br>→244.78(69.77)   | NA | I:875.08(190.29)<br>→871.74(192.58)<br>C:885.44(178.29)<br>→880.73(185.31) | I:20.73(5.06)<br>→20.78(5.00)<br>C:20.39(4.36)<br>→20.19(4.34) | NA | NA |

|                                                |                                                                                                        |                                                              |                                                              |                                                                           |    |                                                                            |                                                                |    |    |
|------------------------------------------------|--------------------------------------------------------------------------------------------------------|--------------------------------------------------------------|--------------------------------------------------------------|---------------------------------------------------------------------------|----|----------------------------------------------------------------------------|----------------------------------------------------------------|----|----|
|                                                | IL-6, ER,<br>ADR                                                                                       |                                                              |                                                              |                                                                           |    |                                                                            |                                                                |    |    |
| Hsu<br>(2020)                                  | Ca, P,<br>PTH, $\beta$ 2-<br>MG, hs-<br>CRP,<br>Alb, Hb,<br>ER,<br>ADR                                 | I: 2.12(0.14)<br>→2.21(0.07)<br>C: 2.12(0.13)<br>→2.16(0.09) | I: 2.05(0.21)<br>→1.94(0.20)<br>C: 2.07(0.21)<br>→2.06(0.20) | I:313.74(104.17)<br>→233.06(63.11)<br>C:285.93(116.61)<br>→276.38(108.50) | NA | NA                                                                         | NA                                                             | NA | NA |
| Li et<br>al.<br>(2020)                         | NA                                                                                                     | NA                                                           | NA                                                           | NA                                                                        | NA | NA                                                                         | NA                                                             | NA | NA |
| Wong<br>(2021)                                 | Ca, P,<br>PTH,<br>SCr,<br>BUN,<br>$\beta$ 2-MG,<br>hs-CRP,<br>IL-6, Hb,<br>ER                          | I: 2.10(0.21)<br>→2.34(0.31)<br>C: 2.16(0.19)<br>→2.21(0.23) | I:2.06(0.29)<br>→1.69(0.29)<br>C:1.94(0.27)<br>→1.82(0.30)   | I:220.61(34.29)<br>→172.93(40.70)<br>C:227.21(33.35)<br>→209.19(37.77)    | NA | I:787.99(198.39)<br>→786.95(199.23)<br>C:722.36(193.63)<br>→721.86(193.40) | I:28.25(5.14)<br>→26.63(5.95)<br>C:26.64(4.66)<br>→26.55(5.20) | NA | NA |
| Ren<br>(2022)                                  | Ca, P,<br>PTH, $\beta$ 2-<br>MG,<br>leptin,<br>SDS,<br>SAS,<br>QOL<br>(SF-<br>36,KDT<br>A), ER,<br>ADR | I: 1.29(0.04)<br>→1.72(0.58)<br>C: 1.23(0.11)<br>→1.89(0.73) | I:2.68(0.92)<br>→1.74(0.45)<br>C:2.63(1.01)<br>→2.20(0.77)   | I:546.29(28.31)<br>→316.52(15.26)<br>C:547.42(28.38)<br>→489.34(19.70)    | NA | NA                                                                         | NA                                                             | NA | NA |
| Patients with uremic pruritus without dialysis |                                                                                                        |                                                              |                                                              |                                                                           |    |                                                                            |                                                                |    |    |
| Liu<br>(2013)                                  | Ca, P,<br>Mg,<br>PTH,<br>SCr,<br>BUN,<br>Hb,                                                           | Wrong unit<br>reported                                       | I:2.21(0.41)<br>→1.88(0.33)<br>C:2.20(0.44)<br>→2.15(0.41)   | I:339.33(29.49)<br>→320.46(29.60)<br>C:337.21(22.95)<br>→330.65(23.74)    | NA | I:669.16(85.22)<br>→587.60(81.20)<br>C:671.82(92.44)<br>→651.16(92.75)     | I:27.33(6.89)<br>→18.31(5.34)<br>C:25.56(8.79)<br>→23.52(8.34) | NA | NA |





**Table S1.** Laboratory data for selected studies (Continued)

| Study (year)                   | FGF23            | B2-MG (mg/L) | CRP (mg/L)                                                 | Alb (g/L) | Hb (g/L)      | IL-6 (pg /mL)  | ADR            | ALT (U/L)          | AST (U/L) |
|--------------------------------|------------------|--------------|------------------------------------------------------------|-----------|---------------|----------------|----------------|--------------------|-----------|
| Uremic clearance granule (UCG) |                  |              |                                                            |           |               |                |                |                    |           |
| Yang (2016)                    | I:777.76(120.88) |              | I:13.95(1.02)                                              |           |               |                |                |                    |           |
|                                | →681.38(115.78)  |              | →12.02(0.92)                                               |           |               |                |                |                    |           |
|                                | C:779.14(127.78) |              | C:14.05(1.11)                                              |           | NA            | NA             | NA             | NA                 | NA        |
|                                | →797.33(138.36)  |              | →14.22(1.31)                                               |           |               |                |                |                    |           |
| Sun et al. (2018)              |                  |              | I:15.78(3.12)                                              |           | I:36.45(5.78) | I:56.89(10.23) | I: 23.89(5.02) |                    |           |
|                                | NA               |              | →8.79(2.12)                                                |           | →45.12(3.56)  | →77.45(9.78)   | →12.56(3.02)   |                    |           |
|                                |                  |              | C:15.23(3.89)                                              |           | C:36.28(5.45) | C:56.80(9.45)  | C:23.78(4.25)  |                    |           |
|                                |                  |              | →12.45(3.61)                                               |           | →40.12(5.12)  | →65.12(6.89)   | →18.57(4.02)   |                    |           |
| Guo et al. (2019)              | NA               | NA           | NA                                                         | NA        | NA            | NA             | NA             | NA                 | NA        |
| Yu et al. (2017)               |                  |              | I:48.57(12.21)                                             |           | I:12.73(3.19) |                |                |                    |           |
|                                | NA               |              | →22.75(8.91)                                               |           | →6.27(3.96)   |                |                |                    |           |
|                                |                  |              | C:50.49(13.46)                                             |           | C:13.09(3.26) | NA             | NA             | NA                 | NA        |
|                                |                  |              | →34.17(9.06)                                               |           | →8.75(3.41)   |                |                |                    |           |
| Cao (2019)                     | NA               | NA           | I:3.16(1.15)<br>→2.72(0.81)<br>C:3.15(1.12)<br>→3.17(1.06) | NA        | NA            | NA             | NA             | NA                 | NA        |
| Kun et al. (2019)              | NA               | NA           | NA                                                         | NA        | NA            | NA             | NA             | NA                 | NA        |
| Li et al. (2019)               |                  |              | I:52.67(12.18)                                             |           | I:12.69(3.21) |                |                |                    |           |
|                                | NA               |              | →22.69(8.87)                                               |           | →6.31(4.02)   |                |                |                    |           |
|                                |                  |              | C:50.52(13.51)                                             |           | C:13.12(3.31) | NA             | NA             | NA                 | NA        |
|                                |                  |              | →34.68(9.37)                                               |           | → 8.81(3.38)  |                |                |                    |           |
| Chen and Li et al. (2020)      |                  |              | I:14.01(0.97)                                              |           |               |                |                |                    |           |
|                                | NA               |              | →6.84(0.69)                                                |           |               |                |                |                    |           |
|                                |                  |              | C:13.87(0.82)                                              |           | NA            | NA             | NA             | I: 6/50<br>C: 4/50 | NA        |
|                                |                  |              | →11.54(1.06)                                               |           |               |                |                |                    |           |
| Xi (2021)                      |                  |              | I:52.57(12.79)                                             |           | I:12.98(3.14) |                |                |                    |           |
|                                | NA               |              | →21.55(8.24)                                               |           | →6.29(1.08)   |                |                |                    |           |
|                                |                  |              | C:52.68(12.81)                                             |           | C:12.97(3.12) | NA             | NA             | NA                 | NA        |
|                                |                  |              | →34.74(9.38)                                               |           | →8.74(2.16)   |                |                |                    |           |

|                                |    |                                                            |                                                              |                                                                |                                                                       |                                                                 |                    |    |    |
|--------------------------------|----|------------------------------------------------------------|--------------------------------------------------------------|----------------------------------------------------------------|-----------------------------------------------------------------------|-----------------------------------------------------------------|--------------------|----|----|
| Li (2021)                      | NA | NA                                                         | NA                                                           | NA                                                             | NA                                                                    | NA                                                              | NA                 | NA | NA |
| Touxie Jiedu Zhiyang Decoction |    |                                                            |                                                              |                                                                |                                                                       |                                                                 |                    |    |    |
| Wang et al. (2015)             | NA | NA                                                         | NA                                                           | NA                                                             | NA                                                                    | NA                                                              | NA                 | NA | NA |
| Zhang et al. (2015)            | NA | NA                                                         | NA                                                           | NA                                                             | NA                                                                    | NA                                                              | NA                 | NA | NA |
| Zhang et al. (2016)            | NA | NA                                                         | I:4.39(4.15)<br>→2.97(1.73)<br>C:4.27(4.23)<br>→4.56(3.91)   | I:31.21(4.54)<br>→33.43(6.14)<br>C:30.03(4.12)<br>→31.41(7.15) | I:102.12(15.21)<br>→115.42(23.03)<br>C:96.41(23.73)<br>→102.37(18.10) | NA                                                              | NA                 | NA | NA |
| Diao et al. (2018)             | NA | NA                                                         | NA                                                           | I:30.67(3.98)<br>→33.45(5.78)<br>C:30.48(4.09)<br>→31.38(6.45) | I:97.25(20.03)<br>→115.39(19.71)<br>C:96.38(19.87)<br>→102.46(16.53)  | NA                                                              | NA                 | NA | NA |
| Shi (2019)                     | NA | NA                                                         | NA                                                           | I:30.12(2.21)<br>→35.02(7.31)<br>C:30.12(2.21)<br>→31.45(3.36) | Incorrect unit conversion                                             | NA                                                              | I: 0/20<br>C: 4/20 | NA | NA |
| Chen (2020)                    | NA | NA                                                         | NA                                                           | NA                                                             | NA                                                                    | NA                                                              | NA                 | NA | NA |
| Yangxue Runfu Yin              |    |                                                            |                                                              |                                                                |                                                                       |                                                                 |                    |    |    |
| Liu (2015)                     | NA | I:2.78(0.21)<br>→2.14(0.22)<br>C:2.81(0.22)<br>→2.35(0.23) | NA                                                           | NA                                                             | NA                                                                    | NA                                                              | I: 4/20<br>C: 7/20 | NA | NA |
| Hu (2019)                      | NA | NA                                                         | NA                                                           | NA                                                             | NA                                                                    | NA                                                              | NA                 | NA | NA |
| Wang et al. (2019)             | NA | I:2.80(2.40)<br>→2.10(1.40)<br>C:2.70(1.20)<br>→2.60(1.89) | I:7.90(2.60) →<br>6.10(1.40)<br>C:8.00(2.70)<br>→ 7.90(2.40) | NA                                                             | NA                                                                    | NA                                                              | I: 1/20<br>C: 0/20 | NA | NA |
| Dou (2021)                     | NA | NA                                                         | I:7.91(2.61) →<br>6.11(1.41)<br>C:8.01(2.71)<br>→ 7.91(2.41) | NA                                                             | NA                                                                    | I: 32.48(6.06)<br>→23.29(5.78)<br>C:31.72(5.92)<br>→30.11(5.42) | NA                 | NA | NA |

[illegible]

|                                                                         |    |                                                           |                                                       |                                                          |                                                            |                                                      |                     |    |    |
|-------------------------------------------------------------------------|----|-----------------------------------------------------------|-------------------------------------------------------|----------------------------------------------------------|------------------------------------------------------------|------------------------------------------------------|---------------------|----|----|
| Wu et al. (2021)                                                        | NA | NA                                                        | NA                                                    | NA                                                       | NA                                                         | NA                                                   | NA                  | NA | NA |
| Zhou et al. (2021)                                                      | NA | NA                                                        | NA                                                    | NA                                                       | NA                                                         | NA                                                   | NA                  | NA | NA |
| Other Chinese herbal decoctions—Control group with additional treatment |    |                                                           |                                                       |                                                          |                                                            |                                                      |                     |    |    |
| Wang et al. (2010)                                                      | NA | NA                                                        | NA                                                    | NA                                                       | NA                                                         | NA                                                   | I: 0/28<br>C: 24/30 | NA | NA |
| Luo et al. (2010)                                                       | NA | NA                                                        | NA                                                    | NA                                                       | NA                                                         | NA                                                   | NA                  | NA | NA |
| Zhang et al. (2011)                                                     | NA | NA                                                        | I:7.27(2.46) → 4.53(2.75)<br>C:7.36(2.35) →7.18(2.64) | NA                                                       | NA                                                         | NA                                                   | NA                  | NA | NA |
| Li (2015)                                                               | NA | NA                                                        | NA                                                    | NA                                                       | NA                                                         | NA                                                   | NA                  | NA | NA |
| Wang et al. (2016)                                                      | NA | NA                                                        | NA                                                    | NA                                                       | NA                                                         | NA                                                   | NA                  | NA | NA |
| Wu (2016)                                                               | NA | NA                                                        | NA                                                    | NA                                                       | NA                                                         | NA                                                   | NA                  | NA | NA |
| Xie (2016)                                                              | NA | NA                                                        | NA                                                    | NA                                                       | NA                                                         | NA                                                   | NA                  | NA | NA |
| Li and Hong et al. (2019)                                               | NA | I:32.62(8.01) →30.15(6.47)<br>C:37.37(10.37) →29.73(8.09) | NA                                                    | NA                                                       | NA                                                         | NA                                                   | NA                  | NA | NA |
| Wu (2019)                                                               | NA | I:16.77(2.29) →10.51(2.63)<br>C:16.70(2.42) →15.82(2.56)  | I:7.22(2.29) → 2.46(1.62)<br>C:7.18(2.28) →3.74(2.15) | NA                                                       | NA                                                         | I:4.88(1.76) →2.23(0.58)<br>C:4.93(1.88) →3.31(0.97) | I: 0/33<br>C: 0/33  | NA | NA |
| Hsu (2020)                                                              | NA | I:23.91(3.16) →22.01(2.59)<br>C:24.06(3.40) →23.75(3.45)  | I:2.50(2.75) → 1.26(1.74)<br>C:2.61(2.85) →2.36(2.39) | I:33.26(2.94) →35.53(2.45)<br>C:33.75(2.93) →33.57(2.32) | I:100.20(5.00) →104.86(6.17)<br>C:99.83(5.39) →99.31(3.64) | NA                                                   | I: 0/35<br>C: 0/35  | NA | NA |

[illegible]



**Table S1.** Laboratory data for selected studies (Continued)

[illegible]

[illegible]

[illegible]

[illegible]

---

**Patients with uremic pruritus without dialysis**

|               |                               |                                                            |                                                            |    |                                                                |                                                                |                                                                        |                                                            |                                                                     |
|---------------|-------------------------------|------------------------------------------------------------|------------------------------------------------------------|----|----------------------------------------------------------------|----------------------------------------------------------------|------------------------------------------------------------------------|------------------------------------------------------------|---------------------------------------------------------------------|
| Liu<br>(2013) | NA                            | NA                                                         | I:1.48(0.32)<br>→0.95(0.24)<br>C:1.47(0.33)<br>→1.10(0.25) | NA | I:12.66(1.73)<br>→14.68(1.36)<br>C:12.79(1.93)<br>→13.39(1.67) | I:32.27(7.25)<br>→35.48(5.99)<br>C:31.86(6.52)<br>→31.23(5.97) | I:194.83(28.49)<br>→178.44(21.98)<br>C:196.71(22.98)<br>→193.00(19.93) | I:5.36(1.25)<br>→5.59(0.95)<br>C:5.47(1.15)<br>→5.55(0.83) | NA                                                                  |
| Lu<br>(2015)  | Incorrect<br>data<br>reported | I:4.72(0.67)<br>→4.67(0.48)<br>C:4.51(0.52)<br>→4.56(0.36) | NA                                                         | NA | NA                                                             | NA                                                             | NA                                                                     | NA                                                         | I:1398.10(857.96)<br>→<br>1474.36(753.72)<br>C:1609.55(1177.8<br>8) |

|        |               |    |    |    |    |    |    |    |                 |
|--------|---------------|----|----|----|----|----|----|----|-----------------|
|        |               |    |    |    |    |    |    |    | →               |
|        |               |    |    |    |    |    |    |    | 1784.44(984.72) |
|        | I:15.48(8.25) |    |    |    |    |    |    |    |                 |
|        | →             |    |    |    |    |    |    |    |                 |
| Zhao   | 19.88(13.10)  | NA              |
| (2018) | C:15.39(7.29) |    |    |    |    |    |    |    |                 |
|        | →16.60(8.68)  |    |    |    |    |    |    |    |                 |
|        | I:16.44(4.13) |    |    |    |    |    |    |    |                 |
| Zhang  | →18.94(4.89)  | NA              |
| (2019) | C:15.49(3.56) |    |    |    |    |    |    |    |                 |
|        | →16.19(4.30)  |    |    |    |    |    |    |    |                 |

**Table S2.** Components of Chinese herbal medicine in the included studies

| References                | Chinese herbal medicine  | Components                                                                                                                                                                                                                                                                                                                                                                                                                                                                                                 |
|---------------------------|--------------------------|------------------------------------------------------------------------------------------------------------------------------------------------------------------------------------------------------------------------------------------------------------------------------------------------------------------------------------------------------------------------------------------------------------------------------------------------------------------------------------------------------------|
| Yang (2016)               | Uremic clearance granule | Rheum officinale (Dahuang), Bupleurum chinens (Chaihu), Astragalus membranaceus (Huangqi), Morus alba (Sangbaipi), Codonopsis pilosula (Dangshen), Paeonia lactiflora (Baishao), Ligusticum chuanxiong (Chuanxiong), Sophora flavescens (Kushen), Chrysanthemum morifolium (Juhua), Pinellia ternata (Banxia), Atractylodes macrocephala (Baizhu), Poria cocos (Fuling), Polygonum multiflorum (Heshouwu), Salviae Miltiorrhizae (Danshen), Herba Plantaginis (Cheqiancao), Glycyrrhiza uralensis (Gancao) |
| Sun et al. (2018)         | Uremic clearance granule | Rheum officinale (Dahuang), Bupleurum chinens (Chaihu), Astragalus membranaceus (Huangqi), Morus alba (Sangbaipi), Codonopsis pilosula (Dangshen), Paeonia lactiflora (Baishao), Ligusticum chuanxiong (Chuanxiong), Sophora flavescens (Kushen), Chrysanthemum morifolium (Juhua), Pinellia ternata (Banxia), Atractylodes macrocephala (Baizhu), Poria cocos (Fuling), Polygonum multiflorum (Heshouwu), Salviae Miltiorrhizae (Danshen), Herba Plantaginis (Cheqiancao), Glycyrrhiza uralensis (Gancao) |
| Guo et al. (2019)         | Uremic clearance granule | Rheum officinale (Dahuang), Bupleurum chinens (Chaihu), Astragalus membranaceus (Huangqi), Morus alba (Sangbaipi), Codonopsis pilosula (Dangshen), Paeonia lactiflora (Baishao), Ligusticum chuanxiong (Chuanxiong), Sophora flavescens (Kushen), Chrysanthemum morifolium (Juhua), Pinellia ternata (Banxia), Atractylodes macrocephala (Baizhu), Poria cocos (Fuling), Polygonum multiflorum (Heshouwu), Salviae Miltiorrhizae (Danshen), Herba Plantaginis (Cheqiancao), Glycyrrhiza uralensis (Gancao) |
| Yu et al. (2017)          | Uremic clearance granule | Rheum officinale (Dahuang), Bupleurum chinens (Chaihu), Astragalus membranaceus (Huangqi), Morus alba (Sangbaipi), Codonopsis pilosula (Dangshen), Paeonia lactiflora (Baishao), Ligusticum chuanxiong (Chuanxiong), Sophora flavescens (Kushen), Chrysanthemum morifolium (Juhua), Pinellia ternata (Banxia), Atractylodes macrocephala (Baizhu), Poria cocos (Fuling), Polygonum multiflorum (Heshouwu), Salviae Miltiorrhizae (Danshen), Herba Plantaginis (Cheqiancao), Glycyrrhiza uralensis (Gancao) |
| Cao (2019)                | Uremic clearance granule | Rheum officinale (Dahuang), Bupleurum chinens (Chaihu), Astragalus membranaceus (Huangqi), Morus alba (Sangbaipi), Codonopsis pilosula (Dangshen), Paeonia lactiflora (Baishao), Ligusticum chuanxiong (Chuanxiong), Sophora flavescens (Kushen), Chrysanthemum morifolium (Juhua), Pinellia ternata (Banxia), Atractylodes macrocephala (Baizhu), Poria cocos (Fuling), Polygonum multiflorum (Heshouwu), Salviae Miltiorrhizae (Danshen), Herba Plantaginis (Cheqiancao), Glycyrrhiza uralensis (Gancao) |
| Kun et al.(2019)          | Uremic clearance granule | Rheum officinale (Dahuang), Bupleurum chinens (Chaihu), Astragalus membranaceus (Huangqi), Morus alba (Sangbaipi), Codonopsis pilosula (Dangshen), Paeonia lactiflora (Baishao), Ligusticum chuanxiong (Chuanxiong), Sophora flavescens (Kushen), Chrysanthemum morifolium (Juhua), Pinellia ternata (Banxia), Atractylodes macrocephala (Baizhu), Poria cocos (Fuling), Polygonum multiflorum (Heshouwu), Salviae Miltiorrhizae (Danshen), Herba Plantaginis (Cheqiancao), Glycyrrhiza uralensis (Gancao) |
| Li et al. (2019)          | Uremic clearance granule | Rheum officinale (Dahuang), Bupleurum chinens (Chaihu), Astragalus membranaceus (Huangqi), Morus alba (Sangbaipi), Codonopsis pilosula (Dangshen), Paeonia lactiflora (Baishao), Ligusticum chuanxiong (Chuanxiong), Sophora flavescens (Kushen), Chrysanthemum morifolium (Juhua), Pinellia ternata (Banxia), Atractylodes macrocephala (Baizhu), Poria cocos (Fuling), Polygonum multiflorum (Heshouwu), Salviae Miltiorrhizae (Danshen), Herba Plantaginis (Cheqiancao), Glycyrrhiza uralensis (Gancao) |
| Chen and Li et al. (2020) | Uremic clearance granule | Rheum officinale (Dahuang), Bupleurum chinens (Chaihu), Astragalus membranaceus (Huangqi), Morus alba (Sangbaipi), Codonopsis pilosula (Dangshen), Paeonia lactiflora (Baishao), Ligusticum chuanxiong (Chuanxiong), Sophora flavescens (Kushen), Chrysanthemum morifolium (Juhua), Pinellia ternata (Banxia), Atractylodes macrocephala (Baizhu), Poria cocos (Fuling), Polygonum multiflorum (Heshouwu), Salviae Miltiorrhizae (Danshen), Herba Plantaginis (Cheqiancao), Glycyrrhiza uralensis (Gancao) |
| Xi (2021)                 | Uremic clearance granule | Rheum officinale (Dahuang), Bupleurum chinens (Chaihu), Astragalus membranaceus (Huangqi), Morus alba (Sangbaipi), Codonopsis pilosula (Dangshen), Paeonia lactiflora (Baishao), Ligusticum chuanxiong (Chuanxiong), Sophora flavescens (Kushen), Chrysanthemum morifolium (Juhua), Pinellia ternata (Banxia), Atractylodes macrocephala (Baizhu), Poria cocos (Fuling), Polygonum multiflorum (Heshouwu), Salviae Miltiorrhizae (Danshen), Herba Plantaginis (Cheqiancao), Glycyrrhiza uralensis (Gancao) |



|                     |                                |                                                                                                                                                                                                                                                                                                                                                                                                                                                                                                                                          |
|---------------------|--------------------------------|------------------------------------------------------------------------------------------------------------------------------------------------------------------------------------------------------------------------------------------------------------------------------------------------------------------------------------------------------------------------------------------------------------------------------------------------------------------------------------------------------------------------------------------|
| Li (2021)           | Uremic clearance granule       | Rheum officinale (Dahuang), Bupleurum chinens (Chaihu), Astragalus membranaceus (Huangqi), Morus alba (Sangbaipi), Codonopsis pilosula (Dangshen), Paeonia lactiflora (Baishao), Ligusticum chuanxiong (Chuanxiong), Sophora flavescens (Kushen), Chrysanthemum morifolium (Juhua), Pinellia ternata (Banxia), Atractylodes macrocephala (Baizhu), Poria cocos (Fuling), Polygonum multiflorum (Heshouwu), Salviae Miltiorrhizae (Danshen), Herba Plantaginis (Cheqiancao), Glycyrrhiza uralensis (Gancao)                               |
| Wang et al. (2015)  | Touxie Jiedu Zhiyang Decoction | Astragalus membranaceus (Huangqi), Scutellaria baicalnsis (Huangqin), Rehmannia glutinosa (Dihuang), Paeonia lactiflora (Baishao), Angelicae Sinensis (Danggui), Dipsaci Radix (Xuduan), Persicae Semen (Taoren), Eucommia ulmoides (Duzhong), Codonopsis pilosula (Dangshen), Chaenomelis Fructus (Mugua), Carthami Flos (Honghua), Spatholobi Caulis (Jixueteng), Clematidis Radix (Weilingxian), Angelicae Dahuricae Radix (Baizhi), Achyranthis Bidentatae Radix (Niuxi), Rheum officinale (Dahuang), Glycyrrhiza uralensis (Gancao) |
| Zhang et al. (2015) | Touxie Zhiyang Decoction       | Astragalus membranaceus (Huangqi), Scutellaria baicalnsis (Huangqin), Rehmannia glutinosa (Dihuang), Paeonia lactiflora (Baishao), Angelicae Sinensis (Danggui), Dipsaci Radix (Xuduan), Persicae Semen (Taoren), Eucommia ulmoides (Duzhong), Codonopsis pilosula (Dangshen), Chaenomelis Fructus (Mugua), Carthami Flos (Honghua), Spatholobi Caulis (Jixueteng), Clematidis Radix (Weilingxian), Angelicae Dahuricae Radix (Baizhi), Achyranthis Bidentatae Radix (Niuxi), Rheum officinale (Dahuang), Glycyrrhiza uralensis (Gancao) |
| Zhang et al. (2016) | Touxie Jiedu Zhiyang Decoction | Astragalus membranaceus (Huangqi), Scutellaria baicalnsis (Huangqin), Rehmannia glutinosa (Dihuang), Paeonia lactiflora (Baishao), Angelicae Sinensis (Danggui), Dipsaci Radix (Xuduan), Persicae Semen (Taoren), Eucommia ulmoides (Duzhong), Codonopsis pilosula (Dangshen), Chaenomelis Fructus (Mugua), Carthami Flos (Honghua), Spatholobi Caulis (Jixueteng), Clematidis Radix (Weilingxian), Angelicae Dahuricae Radix (Baizhi), Achyranthis Bidentatae Radix (Niuxi), Rheum officinale (Dahuang), Glycyrrhiza uralensis (Gancao) |
| Diao et al. (2018)  | Touxie Jiedu Zhiyang Decoction | Astragalus membranaceus (Huangqi), Scutellaria baicalnsis (Huangqin), Rehmannia glutinosa (Dihuang), Paeonia lactiflora (Baishao), Angelicae Sinensis (Danggui), Dipsaci Radix (Xuduan), Persicae Semen (Taoren), Eucommia ulmoides (Duzhong), Codonopsis pilosula (Dangshen), Chaenomelis Fructus (Mugua), Carthami Flos (Honghua), Spatholobi Caulis (Jixueteng), Clematidis Radix (Weilingxian), Angelicae Dahuricae Radix (Baizhi), Achyranthis Bidentatae Radix (Niuxi), Rheum officinale (Dahuang), Glycyrrhiza uralensis (Gancao) |
| Shi (2019)          | Touxie Jiedu Zhiyang Decoction | Astragalus membranaceus (Huangqi), Scutellaria baicalnsis (Huangqin), Rehmannia glutinosa (Dihuang), Paeonia lactiflora (Baishao), Angelicae Sinensis (Danggui), Dipsaci Radix (Xuduan), Persicae Semen (Taoren), Eucommia ulmoides (Duzhong), Codonopsis pilosula (Dangshen), Chaenomelis Fructus (Mugua), Carthami Flos (Honghua), Spatholobi Caulis (Jixueteng), Clematidis Radix (Weilingxian), Angelicae Dahuricae Radix (Baizhi), Achyranthis Bidentatae Radix (Niuxi), Rheum officinale (Dahuang), Glycyrrhiza uralensis (Gancao) |
| Chen (2020)         | Touxie Jiedu Zhiyang Decoction | Astragalus membranaceus (Huangqi), Scutellaria baicalnsis (Huangqin), Rehmannia glutinosa (Dihuang), Paeonia lactiflora (Baishao), Angelicae Sinensis (Danggui), Dipsaci Radix (Xuduan), Persicae Semen (Taoren), Eucommia ulmoides (Duzhong), Codonopsis pilosula (Dangshen), Chaenomelis Fructus (Mugua), Carthami Flos (Honghua), Spatholobi Caulis (Jixueteng), Clematidis Radix (Weilingxian), Angelicae Dahuricae Radix (Baizhi), Achyranthis Bidentatae Radix (Niuxi), Rheum officinale (Dahuang), Glycyrrhiza uralensis (Gancao) |
| Liu (2015)          | Yangxue Runfu Yin              | Astragalus membranaceus (Huangqi), Angelicae Sinensis (Danggui), Rehmanniae Radix (Dihuang), Kochia scoparia (Difuzi), Scutellaria baicalnsis (Huangqin), Asparagus cochinchinensis (Tianmendong), Ophiopogon japonicus (Maidong), Persicae Semen (Taoren), Carthami Flos (Honghua), Trichosanthis Radix (Tianhuafen), Cimicifuga dahurica (Shengma)                                                                                                                                                                                     |
| Hu (2019)           | Yangxue Runfu Yin              | Astragalus membranaceus (Huangqi), Angelicae Sinensis (Danggui), Rehmanniae Radix (Dihuang), Kochia scoparia (Difuzi), Scutellaria baicalnsis (Huangqin), Asparagus cochinchinensis (Tianmendong), Ophiopogon japonicus (Maidong), Persicae Semen (Taoren), Carthami Flos (Honghua), Trichosanthis Radix (Tianhuafen), Cimicifuga dahurica (Shengma)                                                                                                                                                                                     |
| Wang et al. (2019)  | Yangxue Runfu Yin              | Astragalus membranaceus (Huangqi), Angelicae Sinensis (Danggui), Rehmanniae Radix (Dihuang), Kochia scoparia (Difuzi), Scutellaria baicalnsis (Huangqin), Asparagus cochinchinensis (Tianmendong), Ophiopogon japonicus (Maidong), Persicae Semen (Taoren), Carthami Flos (Honghua), Trichosanthis Radix (Tianhuafen), Cimicifuga dahurica (Shengma)                                                                                                                                                                                     |
| Dou (2021)          | Yangxue Runfu Yin              | Astragalus membranaceus (Huangqi), Angelicae Sinensis (Danggui), Rehmanniae Radix (Dihuang), Kochia scoparia (Difuzi), Scutellaria baicalnsis (Huangqin), Asparagus                                                                                                                                                                                                                                                                                                                                                                      |

|                    |                                                                                 |                                                                                                                                                                                                                                                                                                                                                                                                                                                                                               |
|--------------------|---------------------------------------------------------------------------------|-----------------------------------------------------------------------------------------------------------------------------------------------------------------------------------------------------------------------------------------------------------------------------------------------------------------------------------------------------------------------------------------------------------------------------------------------------------------------------------------------|
|                    |                                                                                 | cochinchinensis (Tianmendong), Ophiopogon japonicus (Maidong), Persicae Semen (Taoren), Carthami Flos (Honghua), Trichosanthis Radix (Tianhuafen), Cimicifuga dahurica (Shengma)                                                                                                                                                                                                                                                                                                              |
| Zhu et al. (2004)  | Yangxue Wensheng Decoction                                                      | Aconiti Lateralis Radix Praeparata (Fuzi), Cinnamomum cassia (Rougui), Rehmanniae Radix (Shengdihuang), Polygonum multiflorum (Heshouwu), Angelicae Sinensis (Danggui), Ligusticum chuanxiong (Chuanxiong), Salviae Miltiorrhizae (Danshen), Paeonia anomala (Chishao), Carthami Flos (Honghua), Codonopsis pilosula (Dangshen), Cuscuta chinensis (Tusizi), Schizonepetae Herba (Jingjie), Atractylodis Rhizoma (Cangzhu), Phellodendron amurense (Huangbai), Glycyrrhiza uralensis (Gancao) |
| He (2006)          | Modified Siwu Tang and Erzhi Wan                                                | Angelicae Sinensis (Danggui), Paeonia lactiflora Pall. (Baishao), Rehmanniae Radix (Shengdihuang), Ligusticum chuanxiong (Chuanxiong), Fructus Ligustri Lucidi (Nuzhenzi), Eclipta prostrata (Mohanlian), Dictamni Cortex.(Baixianpi), Kochiae Fructus (Difuzi)                                                                                                                                                                                                                               |
| Wang et al. (2013) | Xiaoyang Particles                                                              | Schizonepetae Herba (Jingjie), Saposhnikovia divaricata (Fangfeng), Cicadae Periostracum (Chantui), Anemarrhena asphodeloides (Zhimu), Gypsum Fibrosum (Shigao), Atractylodis Rhizoma (Cangzhu), Sophora flavescens (Kushen), Angelicae Sinensis (Danggui), Pheretima (Dilong), Rehmanniae Radix (Shengdihuang), Cannabis Fructus (Huomaren), Glycyrrhiza uralensis (Gancao), Rheum officinale (Dahuang)                                                                                      |
| Ge (2018)          | Xiaofeng Zhiyang Particles                                                      | Schizonepetae Herba (Jingjie), Saposhnikovia divaricata (Fangfeng), Cicadae Periostracum (Chantui), Angelicae Sinensis (Danggui), Rehmanniae Radix (Shengdihuang), Lycii Cortex (Digupi), Atractylodis Rhizoma (Cangzhu), Gypsum Fibrosum (Shigao), Akebiae Caulis (Guanmutong), Glycyrrhiza uralensis (Gancao)                                                                                                                                                                               |
| Tang et al. (2018) | Zhiyang Decoction                                                               | Schizonepetae Herba (Jingjie), Saposhnikovia divaricata (Fangfeng), Angelicae Sinensis (Danggui), Polygonum multiflorum (Heshouwu), Rehmanniae Radix (Shengdihuang), Morus alba (Sangye), Sophora flavescens (Kushen), Bombyx Batryticatus (Jiangcan), Cicadae Periostracum (Chantui), Sepiae Endoconcha (Haipiaoxiao), Ostreae Concha (Muli), Fossilia Ossia Mastodi (Longgu), Pueraria lobata (Gegen), Rheum officinale (Dahuang), Salviae Miltiorrhizae (Danshen)                          |
| Liu et al. (2019)  | Jingfu Zhiyang Particles                                                        | Schizonepetae Herba (Jingjie), Saposhnikovia divaricata (Fangfeng), Chrysanthemum morifolium (Juhua), Houttuynia cordata (Yuxingcao), Kochiae Fructus (Difuzi), Crataegi Fructus (Shanzha), Poria cocos (Fuling)                                                                                                                                                                                                                                                                              |
| Fan (2020)         | Touxie Jiedu Zhiyang Decoction                                                  | Spatholobi Caulis (Jixueteng), Angelicae Sinensis (Danggui), Smilacis Glabrae Rhizoma (Tufuling), Rehmanniae Radix (Shengdihuang), Dioscoreae Rhizoma (Shanyao), Clematidis Radix (Weilingxian), Polistes mandarinus Saussure (Fengfang)                                                                                                                                                                                                                                                      |
| Yang et al. (2020) | Baifuzi Weiliang Decoction                                                      | Typhonii Rhizoma (Baifuzi), Atractylodis Rhizoma (Cangzhu), Coptis chinensis (Chuanhuanglian), Sophora flavescens (Kushen), Schizonepetae Herba (Jingjie), Saposhnikovia divaricata (Fangfeng), Cicadae Periostracum (Chantui), Bombyx Batryticatus (Jiangcan), Cnidium monnieri (Shechuangzi), Xanthium strumarium (Cangerzi), Arctii Fructus (Niubangzi), Rehmanniae Radix (Shengdihuang), Tribulus terrestris (Jili), Lonicerae Japonicae Flos (Jinyinhua)                                 |
| Zhao (2020)        | Siwu Decoction                                                                  | Rehmannia glutinosa (Shoudihuang), Angelicae Sinensis (Danggui), Paeonia lactiflora Pall. (Baishao), Ligusticum chuanxiong (Chuanxiong)                                                                                                                                                                                                                                                                                                                                                       |
| Jin et al. (2021)  | Modified Mahuang Lianqiao Chixiaodou Decoction and Yiyifuzhi Baijiang Decoction | Ephedra sinica Stapf (Mahuang), Forsythia suspensa (Lianqiao), Vigna umbellate (Chixiaodou), Amygdalus Communis (Xingren), Mori Cortex (Sangbaipi), Coicis Semen (Yiyiren), Aconiti Lateralis Radix Praeparata (Fuzi), Patrinia villosa (Baijiang), Glycyrrhiza uralensis (Gancao), Zingiberis Rhizoma Recens (Shengjiang), Jujubae Fructus (Dazao), Angelicae Sinensis (Danggui)                                                                                                             |
| Wang et al. (2021) | Feng Xueqing Yin                                                                | Rehmanniae Radix (Shengdihuang), Angelicae Sinensis (Danggui), Paeonia lactiflora Pall. (Baishao), Ligusticum chuanxiong (Chuanxiong), Scrophularia ningpoensis (Xuanshen), Anemarrhena asphodeloides (Zhimu), Schizonepetae Herba (Jingjie), Saposhnikovia divaricata (Fangfeng)                                                                                                                                                                                                             |
| Wu et al. (2021)   | Modified Qufeng Decoction                                                       | Polygoni Multiflori Caulis (Shouwuteng), Dictamni Cortex.(Baixianpi), Spatholobi Caulis (Jixueteng), Cicadae Periostracum (Chantui), Saposhnikovia divaricata (Fangfeng), Glycyrrhiza uralensis (Gancao), Uncaria rhynchophylla (Gouteng), Tribulus terrestris L. (Jili), Kochiae Fructus (Difuzi), Sinomenii Caulis (Qingfengteng), Cnidium monnieri (Shechuangzi), Schizonepetae Herba (Jingjie), Paeonia suffruticosa Andr. (Mudanpi), Carthami Flos (Honghua)                             |
| Zhou et al. (2021) | Chinese herbal medicine                                                         | Astragalus membranaceus (Huangqi), Angelicae Sinensis (Danggui), Salviae Miltiorrhizae (Danshen), Paeonia lactiflora Pall. (Baishao), Atractylodes macrocephala (Baizhu), Dictamni Cortex.(Baixianpi), Kochiae Fructus (Difuzi), Ligusticum chuanxiong (Chuanxiong), Smilacis Glabrae Rhizoma (Tufuling), Schizonepetae Herba (Jingjie), Saposhnikovia divaricata (Fangfeng)                                                                                                                  |

|                              |                                       |                                                                                                                                                                                                                                                                                                                                                                                                                                                                                                                  |
|------------------------------|---------------------------------------|------------------------------------------------------------------------------------------------------------------------------------------------------------------------------------------------------------------------------------------------------------------------------------------------------------------------------------------------------------------------------------------------------------------------------------------------------------------------------------------------------------------|
| Wang et al.<br>(2010)        | Jiebiao Qufengzhiyang particles       | Cinnamomi Ramulus (Guizhi), Paeonia lactiflora Pall. (Baishao), Astragalus membranaceus (Huangqi), Angelicae Sinensis (Danggui), Schizonepetae Herba (Jingjie), Saposhnikovia divaricata (Fangfeng), Ostreae Concha (Muli), Fossilia Ossia Mastodi (Longgu), Mume Fructus (Wumei), Glycyrrhiza uralensis (Gancao), Dictamni Cortex.(Baixianpi), Kochiae Fructus (Difuzi)                                                                                                                                         |
| Luo et al.<br>(2010)         | Chinese herbal medicine               | Astragalus membranaceus (Huangqi), Angelicae Sinensis (Danggui), Codonopsis pilosula (Dangshen), Paeonia lactiflora Pall. (Baishao), Paeonia anomala (Chishao), Persicae Semen (Taoren), Carthami Flos (Honghua), Sophora flavescens (Kushen), Smilacis Glabrae Rhizoma (Tufuling), Dictamni Cortex.(Baixianpi), Kochiae Fructus (Difuzi), Poria cocos (Fuling), Rheum officinale (Dahuang), Glycyrrhiza uralensis (Gancao), Zaocys dhumnades (Wuchiaoshe)                                                       |
| Zhang et al.<br>(2011)       | Qingxin Lianxi Yin                    | Nelumbinis Plumula (Lianzi), Ophiopogon japonicus (Maidong), Angelicae Sinensis (Danggui), Polygonum multiflorum (Heshouwu), Astragalus membranaceus (Huangqi), Codonopsis pilosula (Dangshen), Scutellaria baicalnsis (Huangqin), Lycii Cortex (Digupi), Schizonepetae Herba (Jingjie), Saposhnikovia divaricata (Fangfeng), Poria cocos (Fuling), Glycyrrhiza uralensis (Gancao)                                                                                                                               |
| Li (2015)                    | Modified Siwu Decoction               | Astragalus membranaceus (Huangqi), Rehmannia glutinosa (Shoudihuang), Angelicae Sinensis (Danggui), Ligusticum chuanxiong (Chuanxiong), Vincetoxicum paniculatum (Xuchangqing), Asarum sieboldii (Xixin), Alismatis Rhizoma (Zexie), Paeonia anomala (Chishao), Gastrodia elata (Tianma), Polygonum multiflorum (Heshouwu)                                                                                                                                                                                       |
| Wang et al.<br>(2016)        | Shengyang Xiehuo Decoction            | Bupleurum chinens (Chaihu), Astragalus membranaceus (Huangqi), Paeonia lactiflora (Baishao), Notopterygium incisum (Qianghuo), Cimicifuga dahurica Maxim. (Shengma), Codonopsis pilosula (Dangshen), Angelicae Sinensis (Danggui), Rheum officinale (Dahuang), Salviae Miltiorrhizae (Danshen), Achyranthes bidentata (Niuxi), Coptis chinensis (Huanglian), Cnidium monnieri (Shechuangzi), Dictamni Cortex.(Baixianpi), Kochiae Fructus (Difuzi)                                                               |
| Wu (2016)                    | Jiawei Jiedu Huoxue Decoction         | Forsythia suspensa (Lianqiao), Persicae Semen (Taoren), Carthami Flos (Honghua), Glycyrrhiza uralensis (Gancao), Poncirus trifoliata (Zhiquiao), Pueraria lobata Ohwi (Yege), Angelicae Sinensis (Danggui), Paeonia anomala (Chishao), Rehmanniae Radix (Shengdihuang), Bupleurum chinens (Chaihu), Schizonepetae Herba (Jingjie), Dictamni Cortex.(Baixianpi), Kochiae Fructus (Difuzi), Cicadae Periostracum (Chantui)                                                                                         |
| Xie (2016)                   | Modified Siwu Decoction               | Rehmannia glutinosa (Shoudihuang), Angelicae Sinensis (Danggui), Paeonia anomala (Chishao), Ligusticum chuanxiong (Chuanxiong), Phellodendron amurense Rupr. (Huangbo), Salviae Miltiorrhizae (Danshen), Cnidium monnieri (Shechuangzi), Kochiae Fructus (Difuzi), Asarum sieboldii (Xixin), Alismatis Rhizoma (Zexie), Polygonum multiflorum (Heshouwu), Astragalus membranaceus (Huangqi)                                                                                                                      |
| Li and Hong et al.<br>(2019) | Danggui Yinzi                         | Angelicae Sinensis (Danggui), Paeonia lactiflora Pall. (Baishao), Ligusticum chuanxiong (Chuanxiong), Rehmanniae Radix (Shengdihuang), Tribulus terrestris (Jili), Schizonepetae Herba (Jingjie), Saposhnikovia divaricata (Fangfeng), Polygonum multiflorum (Heshouwu), Astragalus membranaceus (Huangqi), Rheum officinale (Dahuang), Dioscorea opposita Thunb. (Shanyao), Sophora flavescens (Kushen), Atractylodes chinensis (Cangzhu), Glycyrrhiza uralensis (Gancao)                                       |
| Wu (2019)                    | Wushe Rongpi Decoction                | Zaocys dhumnades (Wuchiaoshe), Rehmanniae Radix (Shengdihuang), Angelicae Sinensis (Danggui), Cinnamomi Ramulus (Guizhi), Paeonia anomala (Chishao), Ligusticum chuanxiong (Chuanxiong), Persicae Semen (Taoren), Carthami Flos (Honghua), Paeonia suffruticosa Andr. (Mudanpi), Lithospermum erythrorhizon (Zicao), Polygonum multiflorum (Heshouwu), Dictamni Cortex.(Baixianpi), Tribulus terrestris (Jili), Glycyrrhiza uralensis (Gancao) , Zingiberis Rhizoma Recens (Shengjiang), Jujubae Fructus (Dazao) |
| Hsu (2020)                   | Modified Danggui Yinzi                | Angelicae Sinensis (Danggui), Paeonia lactiflora Pall. (Baishao), Ligusticum chuanxiong (Chuanxiong), Rehmanniae Radix (Shengdihuang), Tribulus terrestris (Jili), Schizonepetae Herba (Jingjie), Saposhnikovia divaricata (Fangfeng), Astragalus membranaceus (Huangqi), Kochiae Fructus (Difuzi), Glycyrrhiza uralensis (Gancao), Sophora flavescens (Kushen), Lycii Cortex (Digupi), Morus alba (Sangbaipi)                                                                                                   |
| Li et al.<br>(2020)          | Mahuang Lianqiao Chixiaodou Decoction | Ephedra sinica Stapf (Mahuang), Forsythia suspensa (Lianqiao), Vigna umbellate (Chixiaodou), Amygdalus Communis (Xingren), Mori Cortex (Sangbaipi), Glycyrrhiza uralensis (Gancao), Zingiberis Rhizoma Recens (Shengjiang), Jujubae Fructus (Dazao),                                                                                                                                                                                                                                                             |
| Wong<br>(2021)               | Taohong Danggui Yinzi                 | Persicae Semen (Taoren), Carthami Flos (Honghua), Angelicae Sinensis (Danggui), Paeonia lactiflora Pall. (Baishao), Ligusticum chuanxiong (Chuanxiong), Rehmanniae Radix (Shengdihuang), Tribulus terrestris (Jili), Schizonepetae Herba (Jingjie), Saposhnikovia divaricata (Fangfeng), Astragalus membranaceus (Huangqi), Glycyrrhiza uralensis (Gancao), Polygonum multiflorum (Heshouwu)                                                                                                                     |

|              |                                  |                                                                                                                                                                                                                                                                                                                                                                                                                                        |
|--------------|----------------------------------|----------------------------------------------------------------------------------------------------------------------------------------------------------------------------------------------------------------------------------------------------------------------------------------------------------------------------------------------------------------------------------------------------------------------------------------|
| Ren (2022)   | Xiaofeng Zhiyang granules        | Schizonepetae Herba (Jingjie), Saposhnikovia divaricata (Fangfeng), Cicadae Periostracum (Chantui), Angelicae Sinensis (Danggui), Rehmanniae Radix (Shengdihuang), Lycii Cortex (Digupi), Atractylodis Rhizoma (Cangzhu), Gypsum Fibrosum (Shigao), Akebiae Caulis (Guanmutong), Glycyrrhiza uralensis (Gancao)                                                                                                                        |
| Liu (2013)   | Buyanghuanwu Tang                | Astragalus membranaceus (Huangqi), Angelicae Sinensis (Danggui), Paeonia anomala (Chishao), Ligusticum chuanxiong (Chuanxiong), Persicae Semen (Taoren), Carthami Flos (Honghua), Pheretima (Dilong)                                                                                                                                                                                                                                   |
| Lu (2015)    | Modified Jiedu Zhiyang Decoction | Angelicae Sinensis (Danggui), Spatholobi Caulis (Jixueteng), Dictamni Cortex.(Baixianpi), Kochiae Fructus (Difuzi)                                                                                                                                                                                                                                                                                                                     |
| Zhao (2018)  | Qingjiangxiezhuo decoction       | Rheum officinale (Dahuang), Astragalus membranaceus (Huangqi), Rehmanniae Radix (Shengdihuang), Poria cocos (Fuling), Citri Reticulatae Pericarpium (Chenpi), Perilla frutescens (L.) Britt. (Suye), Perilla frutescens (L.) Britt (Sugeng), Eupatorium fortunei Turcz. (Peilian), Pueraria lobata (Gegen), Ligusticum chuanxiong (Chuanxiong), Angelicae Sinensis (Danggui), Kochiae Fructus (Difuzi), Glycyrrhiza uralensis (Gancao) |
| Zhang (2019) | Yishen Huoxue Decoction          | Astragalus membranaceus (Huangqi), Angelicae Sinensis (Danggui), Salviae Miltiorrhizae (Danshen), Carthami Flos (Honghua), Rheum officinale (Dahuang), Atractylodes macrocephala (Baizhu), Poria cocos (Fuling), Schizonepetae Herba (Jingjie), Saposhnikovia divaricata (Fangfeng), Dictamni Cortex.(Baixianpi), Kochiae Fructus (Difuzi), Cicadae Periostracum (Chantui), Panax notoginseng (Sanqi)                                  |

**Table S3.** Grade profile summary of ‘Chinese Herbal Medicine for uremic pruritus’ Quality assessment

| Certainty assessment      |                   |              |               |              |             |                                     | No of patients          |                  | Effect                 |                                                | Certainty     | Importance |
|---------------------------|-------------------|--------------|---------------|--------------|-------------|-------------------------------------|-------------------------|------------------|------------------------|------------------------------------------------|---------------|------------|
| No of studies             | Study design      | Risk of bias | Inconsistency | Indirectness | Imprecision | Other considerations                | Chinese herbal medicine | control          | Relative (95% CI)      | Absolute (95% CI)                              |               |            |
| Overall effectiveness     |                   |              |               |              |             |                                     |                         |                  |                        |                                                |               |            |
| 37                        | randomised trials | serious      | not serious   | not serious  | not serious | publication bias strongly suspected | 1070/1232 (86.9%)       | 792/1226 (64.6%) | RR 1.29 (1.23 to 1.35) | 187 more per 1,000 (from 149 more to 226 more) | ⊕⊕○○ Low      | CRITICAL   |
| Visual analog scale (VAS) |                   |              |               |              |             |                                     |                         |                  |                        |                                                |               |            |
| 21                        | randomised trials | serious      | serious       | not serious  | not serious | publication bias strongly suspected | 815                     | 810              | -                      | MD 1.98 lower (2.23 lower to 1.73 lower)       | ⊕○○○ Very low | CRITICAL   |
| PSQI                      |                   |              |               |              |             |                                     |                         |                  |                        |                                                |               |            |
| 3                         | randomised trials | serious      | not serious   | not serious  | serious     | None                                | 93                      | 94               | -                      | MD 2.2 lower (2.77 lower to 1.64 lower)        | ⊕○○○ Very low | CRITICAL   |
| QOL                       |                   |              |               |              |             |                                     |                         |                  |                        |                                                |               |            |
| 4                         | randomised trials | serious      | very serious  | not serious  | serious     | None                                | 137                     | 137              | -                      | MD 7.65 higher (2.71 higher to 12.59 higher)   | ⊕○○○ Very low | CRITICAL   |

| Certainty assessment |              |              |               |              |             |                      | № of patients           |         | Effect            |                   | Certainty | Importance |
|----------------------|--------------|--------------|---------------|--------------|-------------|----------------------|-------------------------|---------|-------------------|-------------------|-----------|------------|
| № of studies         | Study design | Risk of bias | Inconsistency | Indirectness | Imprecision | Other considerations | Chinese herbal medicine | control | Relative (95% CI) | Absolute (95% CI) |           |            |

|                             |                   |             |         |             |             |      |               |                |                        |                                                 |          |          |
|-----------------------------|-------------------|-------------|---------|-------------|-------------|------|---------------|----------------|------------------------|-------------------------------------------------|----------|----------|
| Adverse drug reaction (ADR) |                   |             |         |             |             |      |               |                |                        |                                                 |          |          |
| 8                           | randomised trials | not serious | serious | not serious | not serious | None | 20/258 (7.8%) | 51/261 (19.5%) | RR 0.60 (0.22 to 1.63) | 78 fewer per 1,000 (from 152 fewer to 123 more) | ⊕⊕○○ Low | CRITICAL |

|    |                   |             |              |             |             |      |     |     |   |                                            |               |           |
|----|-------------------|-------------|--------------|-------------|-------------|------|-----|-----|---|--------------------------------------------|---------------|-----------|
| Ca |                   |             |              |             |             |      |     |     |   |                                            |               |           |
| 19 | randomised trials | not serious | very serious | not serious | not serious | None | 680 | 674 | - | MD 0.01 higher (0.09 lower to 0.11 higher) | ⊕○○○ Very low | IMPORTANT |

|    |                   |             |              |             |             |      |     |     |   |                                         |               |           |
|----|-------------------|-------------|--------------|-------------|-------------|------|-----|-----|---|-----------------------------------------|---------------|-----------|
| P  |                   |             |              |             |             |      |     |     |   |                                         |               |           |
| 26 | randomised trials | not serious | very serious | not serious | not serious | None | 868 | 862 | - | MD 0.2 lower (0.28 lower to 0.13 lower) | ⊕○○○ Very low | IMPORTANT |

|     |                   |             |              |             |             |      |     |     |   |                                              |               |           |
|-----|-------------------|-------------|--------------|-------------|-------------|------|-----|-----|---|----------------------------------------------|---------------|-----------|
| PTH |                   |             |              |             |             |      |     |     |   |                                              |               |           |
| 17  | randomised trials | not serious | very serious | not serious | not serious | None | 550 | 548 | - | MD 76.68 lower (115.62 lower to 37.74 lower) | ⊕○○○ Very low | IMPORTANT |

| Certainty assessment |                   |              |               |              |             |                      | № of patients           |         | Effect            |                                              | Certainty     | Importance |
|----------------------|-------------------|--------------|---------------|--------------|-------------|----------------------|-------------------------|---------|-------------------|----------------------------------------------|---------------|------------|
| № of studies         | Study design      | Risk of bias | Inconsistency | Indirectness | Imprecision | Other considerations | Chinese herbal medicine | control | Relative (95% CI) | Absolute (95% CI)                            |               |            |
|                      |                   |              |               |              |             |                      |                         |         |                   |                                              |               |            |
| iPTH                 |                   |              |               |              |             |                      |                         |         |                   |                                              |               |            |
| 6                    | randomised trials | not serious  | very serious  | not serious  | not serious | None                 | 222                     | 224     | -                 | MD 54.63 lower (109.67 lower to 0.42 higher) | ⊕○○○ Very low | IMPORTANT  |
| Creatinine           |                   |              |               |              |             |                      |                         |         |                   |                                              |               |            |
| 17                   | randomised trials | not serious  | very serious  | not serious  | not serious | None                 | 533                     | 531     | -                 | MD 52.31 lower (93.32 lower to 11.31 lower)  | ⊕○○○ Very low | IMPORTANT  |
| BUN                  |                   |              |               |              |             |                      |                         |         |                   |                                              |               |            |
| 15                   | randomised trials | not serious  | very serious  | not serious  | not serious | None                 | 488                     | 486     | -                 | MD 1.97 lower (3.67 lower to 0.26 lower)     | ⊕○○○ Very low | IMPORTANT  |
| eGFR                 |                   |              |               |              |             |                      |                         |         |                   |                                              |               |            |
| 2                    | randomised trials | not serious  | not serious   | not serious  | serious     | None                 | 56                      | 58      | -                 | MD 2.82 higher (0.65 higher to 4.99 higher)  | ⊕⊕○○ Low      | IMPORTANT  |

| Certainty assessment |                   |              |               |              |             |                      | Nº of patients          |         | Effect            |                                              | Certainty     | Importance |
|----------------------|-------------------|--------------|---------------|--------------|-------------|----------------------|-------------------------|---------|-------------------|----------------------------------------------|---------------|------------|
| Nº of studies        | Study design      | Risk of bias | Inconsistency | Indirectness | Imprecision | Other considerations | Chinese herbal medicine | control | Relative (95% CI) | Absolute (95% CI)                            |               |            |
| UA                   |                   |              |               |              |             |                      |                         |         |                   |                                              |               |            |
| 2                    | randomised trials | not serious  | very serious  | not serious  | serious     | None                 | 75                      | 75      | -                 | MD 3.59 higher (49.45 lower to 56.63 higher) | ⊕○○○ Very low | IMPORTANT  |
| CRP                  |                   |              |               |              |             |                      |                         |         |                   |                                              |               |            |
| 16                   | randomised trials | not serious  | very serious  | not serious  | not serious | None                 | 643                     | 638     | -                 | MD 1.9 lower (2.52 lower to 1.27 lower)      | ⊕○○○ Very low | IMPORTANT  |
| TNF-a                |                   |              |               |              |             |                      |                         |         |                   |                                              |               |            |
| 2                    | randomised trials | not serious  | not serious   | not serious  | serious     | None                 | 94                      | 94      | -                 | MD 16.88 lower (19.35 lower to 14.41 lower)  | ⊕⊕○○ Low      | IMPORTANT  |
| B2-MG                |                   |              |               |              |             |                      |                         |         |                   |                                              |               |            |
| 12                   | randomised trials | not serious  | very serious  | not serious  | not serious | None                 | 462                     | 459     | -                 | MD 4.9 lower (6.78 lower to 3.02 lower)      | ⊕○○○ Very low | IMPORTANT  |
| IL-6                 |                   |              |               |              |             |                      |                         |         |                   |                                              |               |            |



| Certainty assessment |                   |              |               |              |             |                      | № of patients           |         | Effect            |                                            | Certainty     | Importance |
|----------------------|-------------------|--------------|---------------|--------------|-------------|----------------------|-------------------------|---------|-------------------|--------------------------------------------|---------------|------------|
| № of studies         | Study design      | Risk of bias | Inconsistency | Indirectness | Imprecision | Other considerations | Chinese herbal medicine | control | Relative (95% CI) | Absolute (95% CI)                          |               |            |
| 4                    | randomised trials | not serious  | very serious  | not serious  | not serious | None                 | 159                     | 159     | -                 | MD 3.36 lower (5.26 lower to 1.45 lower)   | ⊕○○○ Very low | IMPORTANT  |
| Albumin              |                   |              |               |              |             |                      |                         |         |                   |                                            |               |            |
| 6                    | randomised trials | not serious  | very serious  | not serious  | not serious | None                 | 231                     | 231     | -                 | MD 2.01 higher (0.19 lower to 4.22 higher) | ⊕○○○ Very low | IMPORTANT  |
| Hb                   |                   |              |               |              |             |                      |                         |         |                   |                                            |               |            |
| 10                   | randomised trials | not serious  | very serious  | not serious  | not serious | None                 | 333                     | 332     | -                 | MD 4.52 higher (0.23 higher to 8.8 higher) | ⊕○○○ Very low | IMPORTANT  |
| ALT                  |                   |              |               |              |             |                      |                         |         |                   |                                            |               |            |
| 4                    | randomised trials | not serious  | not serious   | not serious  | serious     | None                 | 90                      | 89      | -                 | MD 0.11 lower (2.39 lower to 2.16 higher)  | ⊕⊕○○ Low      | IMPORTANT  |
| AST                  |                   |              |               |              |             |                      |                         |         |                   |                                            |               |            |

| Certainty assessment               |                   |              |               |              |             |                      | № of patients           |         | Effect            |                                           | Certainty     | Importance |
|------------------------------------|-------------------|--------------|---------------|--------------|-------------|----------------------|-------------------------|---------|-------------------|-------------------------------------------|---------------|------------|
| № of studies                       | Study design      | Risk of bias | Inconsistency | Indirectness | Imprecision | Other considerations | Chinese herbal medicine | control | Relative (95% CI) | Absolute (95% CI)                         |               |            |
| 4                                  | randomised trials | not serious  | not serious   | not serious  | serious     | None                 | 90                      | 89      | -                 | MD 0.13 higher (1.7 lower to 1.96 higher) | ⊕⊕○○ Low      | IMPORTANT  |
| K                                  |                   |              |               |              |             |                      |                         |         |                   |                                           |               |            |
| 2                                  | randomised trials | not serious  | not serious   | not serious  | serious     | None                 | 46                      | 44      | -                 | MD 0.02 lower (0.17 lower to 0.14 higher) | ⊕⊕○○ Low      | IMPORTANT  |
| Pruritis score (Duo's VAG/ Sergio) |                   |              |               |              |             |                      |                         |         |                   |                                           |               |            |
| 7                                  | randomised trials | serious      | very serious  | not serious  | not serious | None                 | 211                     | 215     | -                 | MD 6.11 lower (8.28 lower to 3.94 lower)  | ⊕○○○ Very low | IMPORTANT  |
| Pruritis score (Kuypers)           |                   |              |               |              |             |                      |                         |         |                   |                                           |               |            |
| 2                                  | randomised trials | serious      | not serious   | not serious  | serious     | None                 | 61                      | 61      | -                 | MD 5.12 lower (6.49 lower to 3.75 lower)  | ⊕○○○ Very low | IMPORTANT  |

**Table S4. Search Strategy**

|                                                                                                                                                                                                                                                                                                                                                                                                                                                                                                                                                                                                                                                                                                                                                                                                                                                                                                                                                    |
|----------------------------------------------------------------------------------------------------------------------------------------------------------------------------------------------------------------------------------------------------------------------------------------------------------------------------------------------------------------------------------------------------------------------------------------------------------------------------------------------------------------------------------------------------------------------------------------------------------------------------------------------------------------------------------------------------------------------------------------------------------------------------------------------------------------------------------------------------------------------------------------------------------------------------------------------------|
| <b>PUBMED</b>                                                                                                                                                                                                                                                                                                                                                                                                                                                                                                                                                                                                                                                                                                                                                                                                                                                                                                                                      |
| 1. Chronic kidney disease OR kidney injury OR kidney failure OR chronic renal failure OR end-stage renal disease OR end stage renal disease OR dialysis OR hemodialysis OR peritoneal dialysis                                                                                                                                                                                                                                                                                                                                                                                                                                                                                                                                                                                                                                                                                                                                                     |
| 2. Uremic OR Uremia OR uremias                                                                                                                                                                                                                                                                                                                                                                                                                                                                                                                                                                                                                                                                                                                                                                                                                                                                                                                     |
| 3. #1 OR #2                                                                                                                                                                                                                                                                                                                                                                                                                                                                                                                                                                                                                                                                                                                                                                                                                                                                                                                                        |
| 4. Pruritus OR Pruritis OR itch* OR xerosis OR skin problems OR skin disorders                                                                                                                                                                                                                                                                                                                                                                                                                                                                                                                                                                                                                                                                                                                                                                                                                                                                     |
| 5. Chinese patent medicine OR Chinese patent drugs OR Medicine, Chinese Traditional OR chinese herbologia OR Chinese medicine OR Chinese material medical OR Chinese herbs OR Chinese herbal medicine OR Herbal Medicine OR Chin Tradit Pat Med                                                                                                                                                                                                                                                                                                                                                                                                                                                                                                                                                                                                                                                                                                    |
| 6. Formula                                                                                                                                                                                                                                                                                                                                                                                                                                                                                                                                                                                                                                                                                                                                                                                                                                                                                                                                         |
| 7. (Decoction OR Tang)                                                                                                                                                                                                                                                                                                                                                                                                                                                                                                                                                                                                                                                                                                                                                                                                                                                                                                                             |
| 8. (Pill OR Wan)                                                                                                                                                                                                                                                                                                                                                                                                                                                                                                                                                                                                                                                                                                                                                                                                                                                                                                                                   |
| 9. San [Title/Abstract]                                                                                                                                                                                                                                                                                                                                                                                                                                                                                                                                                                                                                                                                                                                                                                                                                                                                                                                            |
| 10. Granule                                                                                                                                                                                                                                                                                                                                                                                                                                                                                                                                                                                                                                                                                                                                                                                                                                                                                                                                        |
| 11. Pian                                                                                                                                                                                                                                                                                                                                                                                                                                                                                                                                                                                                                                                                                                                                                                                                                                                                                                                                           |
| 12. Powder                                                                                                                                                                                                                                                                                                                                                                                                                                                                                                                                                                                                                                                                                                                                                                                                                                                                                                                                         |
| 13. #3 AND #4 AND (#5 OR #6 OR #7 OR #8 OR #9 OR #10 OR #11 OR #12)                                                                                                                                                                                                                                                                                                                                                                                                                                                                                                                                                                                                                                                                                                                                                                                                                                                                                |
| <b>EMBASE</b>                                                                                                                                                                                                                                                                                                                                                                                                                                                                                                                                                                                                                                                                                                                                                                                                                                                                                                                                      |
| 1. 'chronic kidney disease'/exp OR 'chronic kidney disease' OR (chronic AND ('kidney'/exp OR kidney) AND ('disease'/exp OR disease)) OR 'kidney injury'/exp OR 'kidney injury' OR (('kidney'/exp OR kidney) AND ('injury'/exp OR injury)) OR 'kidney failure'/exp OR 'kidney failure' OR (('kidney'/exp OR kidney) AND ('failure'/exp OR failure)) OR 'chronic renal failure'/exp OR 'chronic renal failure' OR (chronic AND ('renal'/exp OR renal) AND ('failure'/exp OR failure)) OR 'end-stage renal disease'/exp OR 'end-stage renal disease' OR ('end stage' AND ('renal'/exp OR renal) AND ('disease'/exp OR disease)) OR 'end stage renal disease'/exp OR 'end stage renal disease' OR (end AND stage AND ('renal'/exp OR renal) AND ('disease'/exp OR disease)) OR 'dialysis'/exp OR dialysis OR 'hemodialysis'/exp OR hemodialysis OR 'peritoneal dialysis'/exp OR 'peritoneal dialysis' OR (peritoneal AND ('dialysis'/exp OR dialysis)) |
| 2. uremic OR 'uremia'/exp OR uremia OR uremias                                                                                                                                                                                                                                                                                                                                                                                                                                                                                                                                                                                                                                                                                                                                                                                                                                                                                                     |
| 3. #1 OR #2                                                                                                                                                                                                                                                                                                                                                                                                                                                                                                                                                                                                                                                                                                                                                                                                                                                                                                                                        |
| 4. 'pruritus'/exp OR pruritus OR 'pruritis'/exp OR pruritis OR itch* OR 'xerosis'/exp OR xerosis OR 'skin problems' OR (('skin'/exp OR skin) AND problems) OR 'skin disorders' OR (('skin'/exp OR skin) AND ('disorders'/exp OR disorders))                                                                                                                                                                                                                                                                                                                                                                                                                                                                                                                                                                                                                                                                                                        |
| 5. 'chinese medicine'/exp OR 'chinese medicine' OR 'herbal medicine'/exp OR 'herbal medicine' OR 'chinese patent medicine':ti,ab,kw OR 'chinese patent drugs':ti,ab,kw OR 'chinese herbologia':ti,ab,kw OR 'medicine, chinese traditional':ti,ab,kw OR 'chinese material medical':ti,ab,kw OR 'chinese herbs':ti,ab,kw OR 'chinese herbal medicine':ti,ab,kw OR 'chin tradit pat med':ti,ab,kw                                                                                                                                                                                                                                                                                                                                                                                                                                                                                                                                                     |
| 6. ('formula'/exp OR formula)                                                                                                                                                                                                                                                                                                                                                                                                                                                                                                                                                                                                                                                                                                                                                                                                                                                                                                                      |
| 7. ('decoction'/exp OR decoction OR tang)                                                                                                                                                                                                                                                                                                                                                                                                                                                                                                                                                                                                                                                                                                                                                                                                                                                                                                          |
| 8. ('pill'/exp OR pill OR wan)                                                                                                                                                                                                                                                                                                                                                                                                                                                                                                                                                                                                                                                                                                                                                                                                                                                                                                                     |
| 9. san:ti,ab,kw                                                                                                                                                                                                                                                                                                                                                                                                                                                                                                                                                                                                                                                                                                                                                                                                                                                                                                                                    |
| 10. ('granule'/exp OR granule)                                                                                                                                                                                                                                                                                                                                                                                                                                                                                                                                                                                                                                                                                                                                                                                                                                                                                                                     |
| 11. ('pian'/exp OR pian)                                                                                                                                                                                                                                                                                                                                                                                                                                                                                                                                                                                                                                                                                                                                                                                                                                                                                                                           |
| 12. ('powder'/exp OR powder)                                                                                                                                                                                                                                                                                                                                                                                                                                                                                                                                                                                                                                                                                                                                                                                                                                                                                                                       |
| 13. #3 AND #4 AND (#5 OR #6 OR #7 OR #8 OR #9 OR #10 OR #11 OR #12)                                                                                                                                                                                                                                                                                                                                                                                                                                                                                                                                                                                                                                                                                                                                                                                                                                                                                |
| <b>Cumulative Index to Nursing and Allied Health Literature (CINAHL)</b>                                                                                                                                                                                                                                                                                                                                                                                                                                                                                                                                                                                                                                                                                                                                                                                                                                                                           |
| 1. (chronic kidney disease OR kidney injury OR kidney failure OR chronic renal failure OR end-stage renal disease OR end stage renal disease OR dialysis OR hemodialysis OR peritoneal dialysis)                                                                                                                                                                                                                                                                                                                                                                                                                                                                                                                                                                                                                                                                                                                                                   |
| 2. (uremic OR Uremia OR uremias)                                                                                                                                                                                                                                                                                                                                                                                                                                                                                                                                                                                                                                                                                                                                                                                                                                                                                                                   |
| 3. #1 OR #2                                                                                                                                                                                                                                                                                                                                                                                                                                                                                                                                                                                                                                                                                                                                                                                                                                                                                                                                        |
| 4. (Pruritus OR Pruritis OR itch* OR xerosis OR skin problems OR skin disorders)                                                                                                                                                                                                                                                                                                                                                                                                                                                                                                                                                                                                                                                                                                                                                                                                                                                                   |
| 5. (Chinese patent medicine OR Chinese patent drugs OR traditional Chinese medicine OR chinese herbologia OR Chinese medicine OR Chinese material medical OR Chinese herbs OR Chinese herbal medicine OR herbal medicine OR Chin Tradit Pat Med)                                                                                                                                                                                                                                                                                                                                                                                                                                                                                                                                                                                                                                                                                                   |
| 6. Formula                                                                                                                                                                                                                                                                                                                                                                                                                                                                                                                                                                                                                                                                                                                                                                                                                                                                                                                                         |
| 7. (Decoction OR Tang)                                                                                                                                                                                                                                                                                                                                                                                                                                                                                                                                                                                                                                                                                                                                                                                                                                                                                                                             |

- 
8. (Pill OR Wan)
  9. Granule
  10. Pian
  11. Powder
  12. San
  13. #3 AND #4 AND (#5 OR #6 OR #7 OR #8 OR #9 OR #10 OR #11 OR #12)
- 

#### **Cochrane Central Register of Controlled Trials**

---

1. (chronic kidney disease OR kidney injury OR kidney failure OR chronic renal failure OR end-stage renal disease OR end stage renal disease OR dialysis OR hemodialysis OR peritoneal dialysis)
  2. (uremic OR Uremia OR uremias)
  3. #1 OR #2
  4. (Pruritus OR Pruritis OR itch\* OR xerosis OR skin problems OR skin disorders)
  5. (Chinese patent medicine OR Chinese patent drugs OR traditional Chinese medicine OR chinese herbologia OR Chinese medicine OR Chinese material medical OR Chinese herbs OR Chinese herbal medicine OR herbal medicine OR Chin Tradit Pat Med)
  6. Formula
  7. (Decoction OR Tang)
  8. (Pill OR Wan)
  9. Granule
  10. Pian
  11. Powder
  12. San
  13. #3 AND #4 AND (#5 OR #6 OR #7 OR #8 OR #9 OR #10 OR #11 OR #12)
- 

#### **Airiti library**

---

1. Chronic kidney disease OR kidney failure OR dialysis OR hemodialysis OR peritoneal dialysis OR renal failure OR renal insufficiency OR membranous glomerulonephritis OR nephritis OR uremic OR Uremia OR uremias
  2. Pruritus OR Pruritis OR itch\* OR xerosis OR Skin Diseases
  3. Chinese medicine OR chinese herbal medicine OR chinese and western medicine OR prescription OR (Decoction OR Tang) OR (Pill OR Wan) OR san OR formula OR powder OR granule OR pian OR jian
  4. #1 AND #2 AND #3
- 

#### **China National Knowledge Infrastructure**

---

1. Chronic kidney disease OR kidney failure OR dialysis OR hemodialysis OR peritoneal dialysis OR renal failure OR renal insufficiency OR membranous glomerulonephritis OR nephritis OR uremic OR Uremia OR uremias
  2. Pruritus OR Pruritis OR itch\* OR xerosis OR Skin Diseases
  3. Chinese medicine OR chinese herbal medicine OR chinese and western medicine OR prescription OR (Decoction OR Tang) OR (Pill OR Wan) OR san OR formula OR powder OR granule OR pian OR jian
  4. #1 AND #2 AND #3
- 

#### **Wangfang**

---

1. Chronic kidney disease OR kidney failure OR dialysis OR hemodialysis OR peritoneal dialysis OR renal failure OR renal insufficiency OR membranous glomerulonephritis OR nephritis OR uremic OR Uremia OR uremias
  2. Pruritus OR Pruritis OR itch\* OR xerosis OR Skin Diseases
  3. Chinese medicine OR chinese herbal medicine OR chinese and western medicine OR prescription OR (Decoction OR Tang) OR (Pill OR Wan) OR san OR formula OR powder OR granule OR pian OR jian
  4. #1 AND #2 AND #3
-
